# Supplementary material
Source: MDPI journal article supplement (https://www.mdpi.com/2071-1050/9/6/967)
Supplement: s1 [file s1]

## Sheet: Figure 1
The underlying energy intensity data for Figure 1 in the manuscript.
	raw data (MJ/1990 internatial G-K dollars)						used data(by HP filter) (MJ/1990 internatial G-K dollars)
year	swe	net	eng	ger	fra	ita	swe_hpt	net_hpt	eng_hpt	ger_hpt	fra_hpt	ita_hpt
1800	0.162	3.44	22.537				0.280597	3.41683	22.3208
1801	0.242	3.449	22.487				0.287069	3.39663	22.3064
1802	0.152	3.506	22.351				0.293466	3.37644	22.292
1803	0.232	3.171	22.222				0.299687	3.35631	22.2781
1804	0.323	3.282	22.277				0.30554	3.33637	22.2648
1805	0.229	3.296	22.221				0.310794	3.31663	22.2525
1806	0.376	3.345	22.137				0.315225	3.29707	22.2413
1807	0.46	3.102	22.293				0.318561	3.27766	22.2316
1808	0.656	3.308	22.189				0.320566	3.2584	22.2234
1809	0.558	3.288	22.291				0.321094	3.23916	22.217
1810	0.366	3.242	22.335				0.320207	3.21986	22.2126
1811	0.273	3.28	22.334				0.318116	3.20045	22.2104
1812	0.29	3.321	22.387				0.315061	3.1809	22.2108
1813	0.21	3.44	22.466				0.311253	3.16121	22.2141
1814	0.204	3.488	22.241				0.306887	3.14148	22.2208
1815	0.333	2.714	22.204				0.302096	3.12198	22.2316
1816	0.336	2.759	22.256				0.296949	3.10321	22.2471
1817	0.345	2.998	22.226				0.291531	3.08539	22.268
1818	0.275	3.025	22.278				0.285956	3.06855	22.295
1819	0.277	3.162	22.352				0.280368	3.05265	22.3287
1820	0.272	2.986	22.404		0.892		0.274906	3.03763	22.3697		0.726398
1821	0.264	3.038	22.369		0.844		0.269705	3.02349	22.4187		0.813539
1822	0.258	2.928	22.394		0.918		0.264901	3.01021	22.4762		0.900784
1823	0.257	2.779	22.559		0.887		0.260624	2.99776	22.543		0.988255
1824	0.251	2.943	22.475		0.953		0.257001	2.98609	22.6196		1.07608
1825	0.244	3.194	22.436		1.109		0.254156	2.97498	22.7066		1.16434
1826	0.246	3.213	22.488		1.117		0.252209	2.9642	22.8044		1.25303
1827	0.31	3.04	22.448		1.637		0.251275	2.95366	22.9135		1.34209
1828	0.242	3.091	22.454		1.72		0.251464	2.94341	23.0339		1.43141
1829	0.236	2.997	23.017		1.63		0.252922	2.93357	23.1655		1.52104
1830	0.359	3.331	22.958		1.764		0.255792	2.92434	23.3077		1.61122
1831	0.23	2.758	22.984		1.611		0.260203	2.91598	23.46		1.70225
1832	0.235	3.013	23.01		1.648		0.266351	2.90897	23.6214		1.79455
1833	0.225	2.907	23.357		1.82		0.274412	2.90373	23.7909		1.88845
1834	0.33	2.661	23.879		2.072		0.284542	2.90071	23.9669		1.9842
1835	0.384	2.815	24.227		2.029		0.296867	2.90038	24.1477		2.08202
1836	0.37	2.808	24.55		2.376		0.31154	2.90307	24.3314		2.18217
1837	0.319	2.897	24.899		2.523		0.328772	2.90904	24.5162		2.28489
1838	0.376	3.016	25.225		2.53		0.348806	2.91848	24.7005		2.39052
1839	0.42	2.915	25.736		2.531		0.371881	2.93161	24.8828		2.49958
1840	0.414	3.124	26.064		2.383		0.398254	2.94868	25.062		2.61264
1841	0.414	2.935	25.668		2.747		0.42821	2.96994	25.2377		2.73032
1842	0.596	2.929	25.336		2.884		0.462046	2.99574	25.4098		2.85308
1843	0.467	3.08	25.655		2.835		0.500048	3.02643	25.5787		2.9814
1844	0.438	2.884	25.923		2.825		0.542588	3.06229	25.7447		3.11577
1845	0.574	3.557	25.822		3.463		0.590014	3.10366	25.9081		3.2566
1846	0.541	3.01	26		3.588		0.642612	3.15075	26.0694		3.40412
1847	0.473	3.452	26.336		3.654		0.700657	3.20406	26.229		3.55865
1848	0.704	3.307	26.298		3.094		0.764359	3.264	26.3872		3.72069
1849	0.769	3.216	26.596		3.124		0.833788	3.33114	26.5445		3.89075
1850	0.88	3.333	26.653	3.841	3.483		0.908975	3.40608	26.7011	3.99327	4.06896
1851	0.93	3.127	26.655	4.266	3.617		0.98991	3.48933	26.8577	4.39828	4.25498
1852	0.938	3.412	26.993	4.717	3.759		1.07657	3.58137	27.0144	4.80321	4.44809
1853	0.878	3.379	27.984	5.055	4.686		1.16888	3.68245	27.1715	5.20786	4.6472
1854	1.04	3.574	26.771	5.768	5.131		1.26669	3.79272	27.3293	5.612	4.85075
1855	1.014	3.945	27.014	6.79	5.914		1.36968	3.91213	27.4885	6.01532	5.05723
1856	1.446	3.669	27.511	6.747	5.954		1.47737	4.04049	27.6494	6.41757	5.26529
1857	1.769	3.705	27.325	6.824	5.727		1.58905	4.17765	27.8122	6.81902	5.47414
1858	1.705	4.064	27.665	7.429	5.248		1.70402	4.32321	27.9769	7.22011	5.68339
1859	2.134	4.358	27.695	7.015	5.694		1.82166	4.47647	28.1432	7.62133	5.89283
1860	2.057	4.825	28.196	7.098	5.81		1.94138	4.6366	28.3105	8.02325	6.10196
1861	2.653	4.498	28.698	8.219	6.713	1.054	2.06276	4.80266	28.4782	8.4261	6.31018	0.773134
1862	2.74	4.278	28.539	8.577	6.528	0.928	2.18547	4.97385	28.6453	8.82951	6.51669	0.788518
1863	2.566	4.14	27.848	8.634	6.392	0.894	2.30954	5.14916	28.8111	9.23299	6.72094	0.804078
1864	2.695	5.564	28.978	9.598	6.734	0.881	2.43536	5.32717	28.9749	9.63589	6.92239	0.820077
1865	2.7	6.097	30.336	10.643	7.315	0.863	2.56345	5.5058	29.1352	10.0372	7.1203	0.836832
1866	2.789	6.171	29.988	10.509	7.867	0.909	2.69453	5.68315	29.2908	10.4358	7.31381	0.854702
1867	2.546	6.385	29.292	11.457	8.496	0.925	2.82938	5.85767	29.441	10.8311	7.50218	0.874059
1868	3.272	6.512	28.688	11.617	7.925	0.935	2.96884	6.02811	29.5855	11.2225	7.68501	0.895311
1869	2.702	6.399	28.025	12.008	7.903	0.884	3.11358	6.19357	29.7242	11.6097	7.86254	0.918897
1870	2.923	6.752	29.734	11.907	7.622	0.883	3.26447	6.35342	29.8561	11.9927	8.03514	0.945281
1871	3.002	7.077	30.463	13.362	7.63	0.75	3.4221	6.50721	29.9794	12.3718	8.20322	0.974905
1872	3.681	7.241	31.166	13.44	8.445	0.891	3.58686	6.65468	30.092	12.7472	8.36691	1.00817
1873	3.476	6.795	30.083	13.726	9.846	0.869	3.75888	6.79597	30.1924	13.1198	8.526	1.04534
1874	3.654	6.596	31.07	12.747	8.264	0.869	3.93835	6.93157	30.2794	13.4907	8.68034	1.08661
1875	4.55	6.629	30.879	13.104	8.347	0.913	4.12526	7.06196	30.352	13.8617	8.83057	1.13206
1876	4.488	7.501	30.369	13.407	9.111	1.198	4.31944	7.18743	30.4097	14.2339	8.9771	1.18162
1877	4.821	6.889	30.242	13.217	8.497	1.082	4.52101	7.30798	30.4521	14.6079	9.12003	1.2351
1878	4.293	6.527	29.191	13.01	8.741	1.041	4.73014	7.42382	30.479	14.9841	9.25954	1.29232
1879	4.064	8.329	31.231	14.117	9.697	1.208	4.94724	7.5349	30.49	15.3617	9.39541	1.35301
1880	5.247	7.852	31.455	16.628	10.022	1.29	5.17241	7.6406	30.4838	15.7387	9.52713	1.41672
1881	4.991	8.398	31.489	16.757	9.859	1.418	5.40522	7.74079	30.4598	16.1126	9.65433	1.48293
1882	5.838	8.852	32.776	17.626	9.982	1.505	5.64528	7.83549	30.4177	16.4811	9.777	1.55103
1883	5.679	7.95	31.875	17.784	10.399	1.566	5.89193	7.92513	30.3581	16.8425	9.89522	1.62037
1884	6.041	7.857	30.944	17.843	10.127	1.761	6.14466	8.01075	30.2829	17.1958	10.0092	1.69029
1885	6.385	7.599	29.309	17.871	9.912	1.93	6.40279	8.09344	30.195	17.5406	10.1195	1.76006
1886	6.167	7.926	29.149	17.957	9.696	1.81	6.66561	8.17417	30.0979	17.8768	10.2267	1.82903
1887	6.484	7.737	28.861	18.003	10.128	2.134	6.93236	8.2536	29.9941	18.2046	10.3314	1.89664
1888	6.946	9.312	29.788	18.897	10.4	2.276	7.20201	8.33225	29.8861	18.5242	10.4336	1.96231
1889	7.996	7.826	30.27	19.562	10.43	2.418	7.47321	8.41032	29.7751	18.8358	10.5333	2.02563
1890	7.862	8.63	31.554	19.857	11.222	2.549	7.74449	8.4886	29.6627	19.1396	10.6306	2.08636
1891	7.867	8.64	30.688	21.074	11.019	2.222	8.01468	8.56753	29.5506	19.4365	10.7255	2.14452
1892	7.946	8.155	25.566	19.767	10.743	2.198	8.28269	8.64764	29.4416	19.7276	10.8181	2.20043
1893	7.77	9.674	29.503	19.32	10.328	2.073	8.54734	8.7295	29.3394	20.0154	10.909	2.25444
1894	9.09	8.382	27.84	19.584	10.518	2.534	8.80722	8.81337	29.2452	20.3019	10.9987	2.3069
1895	8.67	8.655	28.444	19.43	10.88	2.297	9.06048	8.9001	29.1603	20.5891	11.0872	2.35806
1896	8.725	8.825	27.965	20.134	10.715	2.162	9.3054	8.99028	29.0851	20.8784	11.1744	2.4083
1897	9.217	8.437	26.523	20.987	11.36	2.223	9.54003	9.08433	29.0196	21.1705	11.2597	2.45796
1898	9.27	8.21	29.595	20.921	11.241	2.294	9.76208	9.1826	28.963	21.4656	11.3427	2.50723
1899	11.083	7.973	29.372	21.435	11.123	2.467	9.96902	9.28499	28.9131	21.7637	11.4227	2.55617
1900	11.022	9.686	27.292	22.157	12.078	2.466	10.158	9.39083	28.868	22.0646	11.4992	2.60467
1901	10.098	9.681	29.179	22.584	11.891	2.355	10.327	9.4986	28.826	22.3679	11.5712	2.6526
1902	10.574	8.635	29.274	21.622	11.408	2.538	10.4744	9.60699	28.7846	22.6732	11.6383	2.69972
1903	10.895	9.135	28.504	22.083	12.267	2.546	10.5984	9.7148	28.7414	22.9803	11.7002	2.74563
1904	11.271	10.105	27.899	22.011	11.886	2.581	10.6974	9.8202	28.6943	23.2881	11.7566	2.78979
1905	11.108	9.741	29.402	22.174	11.728	2.734	10.7699	9.92102	28.6412	23.5953	11.8074	2.83156
1906	11.417	9.665	31.878	24.338	12.374	3.154	10.8149	10.0153	28.5792	23.8995	11.8525	2.87018
1907	11.882	10.428	29.081	24.859	12.656	3.297	10.8313	10.1008	28.5063	24.1977	11.8921	2.90481
1908	13.248	10.998	28.669	24.887	12.822	3.323	10.8186	10.1753	28.4221	24.4869	11.9263	2.93479
1909	11.948	10.942	27.927	24.235	12.535	3.6	10.7771	10.2367	28.3269	24.7646	11.9561	2.9597
1910	11.902	11.026	28.699	23.612	13.458	3.566	10.7082	10.2834	28.2211	25.0286	11.9826	2.97938
1911	11.35	11.315	25.729	23.599	12.71	3.613	10.6145	10.3141	28.1047	25.2765	12.0076	2.99407
1912	11.782	12.183	29.047	24.186	11.873	3.656	10.499	10.3281	27.9781	25.5046	12.0338	3.00435
1913	12.652	13.664	26.345	24.745	12.953	3.818	10.3653	10.3255	27.8402	25.7086	12.0642	3.01121
1914	11.513	11.934	25.232	27.057	9.615	3.426	10.2178	10.3072	27.6906	25.8831	12.1017	3.01604
1915	11.481	11.8	25.986	26.492	8.589	2.665	10.0623	10.2765	27.528	26.0223	12.1499	3.02074
1916	11.3	10.623	26.938	28.354	8.667	2.374	9.90539	10.2375	27.3493	26.1208	12.2107	3.02746
1917	5.333	7.797	30.233	29.659	11.381	1.613	9.75463	10.1953	27.1508	26.174	12.284	3.03813
1918	6.553	7.203	29.977	28.445	12.883	1.831	9.61838	10.1553	26.9284	26.1781	12.3671	3.05428
1919	6.04	8.678	31.298	27.302	11.668	2.084	9.50226	10.1214	26.6798	26.1321	12.4571	3.07652
1920	7.772	8.658	31.17	27.081	13.244	2.263	9.40997	10.0957	26.4048	26.0358	12.5512	3.10473
1921	5.002	8.697	21.106	27.149	12.571	2.697	9.34305	10.0792	26.106	25.8903	12.6463	3.13815
1922	7.371	9.612	25.669	27.693	12.544	2.943	9.30201	10.0722	25.7889	25.6969	12.7395	3.17551
1923	8.56	9.458	26.206	24.816	13.481	2.968	9.28465	10.074	25.456	25.458	12.8281	3.21524
1924	9.574	9.87	28.101	29.208	13.363	3.621	9.28756	10.0838	25.1096	25.177	12.909	3.25565
1925	8.574	9.94	24.755	26.425	13.511	3.304	9.30689	10.1002	24.7527	24.8571	12.9798	3.29488
1926	7.993	9.352	17.267	23.749	13.627	3.965	9.33895	10.1218	24.3899	24.5039	13.0382	3.33129
1927	10.592	10.037	24.975	22.998	14.396	4.354	9.3796	10.1471	24.026	24.1241	13.0822	3.36328
1928	9.468	9.801	23.498	24.327	13.373	3.744	9.42388	10.1739	23.6612	23.7238	13.1103	3.38961
1929	10.593	10.709	26.454	26.029	13.82	4.577	9.46754	10.2003	23.2963	23.3085	13.1218	3.40967
1930	10.245	10.508	25.07	23.126	14.518	4.113	9.5064	10.2239	22.9322	22.8838	13.1161	3.42309
1931	10.465	11.113	22.604	21.086	14.33	3.658	9.53697	10.2427	22.5715	22.4575	13.0931	3.4302
1932	10.827	10.789	20.844	20.608	13.56	2.969	9.55622	10.2549	22.2184	22.0372	13.0534	3.43178
1933	10.841	10.988	20.072	20.203	13.12	3.323	9.5617	10.2592	21.8768	21.6296	12.9987	3.42875
1934	11.211	11.354	20.618	20.612	13.187	4.106	9.55175	10.2547	21.5501	21.2407	12.9308	3.42174
1935	11.229	10.588	20.53	18.573	13.009	4.241	9.52552	10.2407	21.2403	20.8755	12.8515	3.41131
1936	11.88	10.36	21.331	18.828	12.905	3.117	9.48319	10.2177	20.949	20.5387	12.7629	3.39845
1937	13.282	10.831	22.036	19.362	13.36	3.964	9.42601	10.1858	20.6772	20.2335	12.6672	3.38467
1938	11.826	10.861	18.682	19.21	12.573	3.82	9.35671	10.1457	20.4262	19.9619	12.5667	3.3713
1939	12.218	11.125	17.824	17.875	11.319	3.564	9.28046	10.0983	20.1983	19.7257	12.464	3.36004
1940	8.161	9.307	18.098	18.661	9.796	3.93	9.20395	10.0449	19.9944	19.5258	12.3619	3.35286
1941	6.766	9.35	17.922	16.926	10.371	3.312	9.13571	9.98745	19.8141	19.3623	12.2622	3.35187
1942	6.111	9.816	18.701	17.354	11.748	3.276	9.08363	9.92753	19.6559	19.2346	12.1654	3.35952
1943	7.057	10.032	18.974	16.477	12.627	2.505	9.05411	9.86627	19.517	19.1405	12.0707	3.37827
1944	5.662	10.284	19.926	13.892	9.651	1.518	9.05168	9.80471	19.394	19.0768	11.977	3.41048
1945	2.722	7.033	19.129	8.358	12.625	1.68	9.07964	9.74404	19.2831	19.0386	11.8836	3.45802
1946	6.771	9.632	19.148	22.986	12.769	2.685	9.13918	9.6857	19.1811	19.0176	11.7882	3.52152
1947	8.69	10.408	18.565	23.908	12.928	3.84	9.22749	9.62948	19.0843	18.9991	11.6893	3.60054
1948	9.786	10.792	19.654	23.945	12.704	3.525	9.34029	9.5751	18.9894	18.9705	11.5856	3.69411
1949	8.581	10.056	19.343	23.175	12.852	3.692	9.47297	9.5228	18.8924	18.9227	11.4769	3.8014
1950	10.028	9.39	20.141	21.25	10.554	3.719	9.62119	9.47355	18.79	18.8494	11.3635	3.92147
1951	11.201	9.844	19.967	22.088	11.299	4.157	9.78006	9.42867	18.6791	18.747	11.2466	4.05332
1952	11.411	9.65	19.188	21.318	11.521	4.138	9.94495	9.38942	18.5572	18.6135	11.1271	4.19583
1953	10.277	8.917	18.779	20.03	10.143	4.292	10.1121	9.35734	18.4231	18.449	11.0056	4.34793
1954	10.085	8.856	19.168	19.23	10.746	4.711	10.2787	9.3341	18.2756	18.2552	10.8832	4.50853
1955	11.657	8.621	19.265	19.182	10.344	4.676	10.442	9.32113	18.1138	18.0348	10.7602	4.67649
1956	12.639	9.372	19.655	18.865	11.048	4.594	10.5991	9.31952	17.9374	17.7911	10.6372	4.85081
1957	11.834	9.281	18.487	18.221	11.044	4.989	10.7479	9.32996	17.7468	17.5283	10.5142	5.03048
1958	11.234	8.851	17.302	17.575	10.614	4.49	10.8878	9.35316	17.5436	17.2509	10.3916	5.21432
1959	9.754	8.888	16.33	15.832	10.443	5.093	11.0184	9.38978	17.3296	16.9642	10.2701	5.40116
1960	11.272	8.639	17.319	14.615	9.363	5.202	11.1398	9.44021	17.1067	16.6735	10.1506	5.58933
1961	10.769	8.342	16.541	14.455	9.223	5.418	11.2515	9.50448	16.876	16.3835	10.034	5.77701
1962	11.077	8.798	16.152	14.787	9.385	5.884	11.3527	9.58215	16.6389	16.0975	9.92071	5.9621
1963	11.167	9.619	16.266	15.392	9.633	6.158	11.4424	9.67203	16.3964	15.8177	9.81078	6.14232
1964	11.401	9.167	15.974	14.959	9.603	6.574	11.5197	9.77247	16.1494	15.5454	9.7038	6.31529
1965	11.26	9.006	15.99	14.385	9.35	6.945	11.5832	9.88176	15.8985	15.2817	9.59928	6.47868
1966	12.196	9.615	15.21	14.001	8.992	6.909	11.6315	9.99782	15.6444	15.0273	9.49666	6.6303
1967	11.317	9.339	14.805	13.905	9.132	7.084	11.6632	10.118	15.3877	14.7823	9.39524	6.76827
1968	12.116	9.974	15.015	14.016	9.262	7.272	11.677	10.2395	15.1287	14.5462	9.294	6.89086
1969	12.348	9.994	15.128	14.157	9.324	7.602	11.6715	10.3589	14.8676	14.318	9.19174	6.99656
1970	12.849	11.228	14.933	14.171	9.378	8.145	11.6455	10.4728	14.6043	14.0964	9.08726	7.08408
1971	12.213	11.143	13.762	14.007	9.239	7.76	11.5984	10.5772	14.3389	13.8797	8.97943	7.15252
1972	11.819	11.944	13.971	13.814	9.28	7.991	11.5302	10.6691	14.0716	13.6667	8.86731	7.20165
1973	11.871	12.065	14.768	14.036	9.513	8.046	11.4412	10.7455	13.8026	13.4559	8.75011	7.23159
1974	11.336	12.26	13.692	13.497	9.01	7.783	11.3322	10.8042	13.5316	13.2461	8.62732	7.24299
1975	11.593	10.864	13.007	13.001	8.489	7.667	11.2038	10.8439	13.2591	13.0363	8.49888	7.23698
1976	12.069	11.688	12.714	13.33	8.855	7.718	11.0572	10.8643	12.9859	12.8259	8.36498	7.21505
1977	11.827	11.24	12.616	12.834	8.38	7.346	10.8932	10.865	12.7122	12.6141	8.22582	7.17895
1978	10.698	11.337	12.812	12.861	8.574	7.173	10.7138	10.8461	12.4385	12.4004	8.08188	7.13072
1979	11.82	12.649	13.706	12.874	8.499	7.106	10.5211	10.8079	12.1648	12.1846	7.93375	7.07256
1980	10.454	11.555	12.42	12.243	8.253	6.839	10.3176	10.7513	11.8917	11.9665	7.78233	7.00663
1981	9.107	10.357	11.529	11.736	7.578	6.65	10.1064	10.6779	11.6205	11.7466	7.62887	6.93517
1982	8.969	9.65	11.04	11.316	7.188	6.453	9.89056	10.5902	11.353	11.5255	7.47491	6.86028
1983	8.842	9.853	10.552	11.124	6.945	6.355	9.67285	10.4903	11.0909	11.3038	7.32196	6.78389
1984	8.292	10.465	9.77	11.04	6.758	6.279	9.45521	10.3796	10.8357	11.0819	7.17136	6.70768
1985	9.027	10.025	9.986	10.944	6.809	6.202	9.23915	10.2594	10.5885	10.8601	7.0242	6.63305
1986	9.386	10.4	9.79	10.786	6.638	6.02	9.02543	10.1309	10.3498	10.6388	6.88132	6.56115
1987	8.321	9.994	9.702	10.7	6.534	6.137	8.81469	9.99501	10.1196	10.4182	6.74342	6.49285
1988	8.597	9.52	9.604	10.293	6.203	6.053	8.6078	9.85309	9.89788	10.1989	6.61106	6.42868
1989	7.926	9.264	9.575	9.706	6.12	6.171	8.4053	9.70631	9.68399	9.98146	6.48466	6.36896
1990	7.707	8.986	9.682	9.984	6.1	6.079	8.20775	9.55569	9.47727	9.76657	6.36438	6.31375
1991	7.509	9.465	9.692	9.302	6.224	6.105	8.01538	9.40196	9.27697	9.55475	6.25016	6.26302
1992	7.467	9.063	9.174	8.804	5.957	6.098	7.82813	9.2455	9.08247	9.34663	6.14177	6.21656
1993	7.613	8.853	8.873	8.891	6.06	6.098	7.64562	9.08674	8.89338	9.14272	6.03898	6.17409
1994	7.497	9.062	8.563	8.604	5.62	5.808	7.46725	8.92597	8.70942	8.94316	5.94142	6.13523
1995	7.345	8.705	8.271	8.5	5.627	6.211	7.29237	8.76335	8.53024	8.74795	5.84874	6.09957
1996	7.311	9.246	8.359	8.7	5.997	6.118	7.12039	8.59913	8.35544	8.55686	5.7604	6.06649
1997	7.087	8.668	7.946	8.36	5.543	6.026	6.95071	8.43351	8.18444	8.36952	5.67571	6.03545
1998	6.808	7.863	7.76	8.152	5.741	6.138	6.7829	8.26711	8.01667	8.18565	5.59413	6.00591
1999	6.418	7.228	7.663	7.782	5.567	6.145	6.61656	8.10069	7.85139	8.00496	5.51506	5.97737
2000	6.13	7.553	7.962	7.576	5.298	6.058	6.45135	7.93474	7.68774	7.82714	5.43795	5.94938
2001	6.445	7.553	8.059	7.655	5.52	5.872	6.28678	7.76924	7.5247	7.65173	5.3623	5.9216
2002	6.682	7.601	7.655	7.536	5.442	5.872	6.12217	7.6039	7.36145	7.47813	5.28755	5.89377
2003	6.384	7.8	7.542	7.496	5.436	6.164	5.95694	7.4383	7.19749	7.30573	5.21319	5.86558
2004	6.037	7.74	7.342	7.463	5.436	6.071	5.79085	7.27204	7.03251	7.13396	5.13885	5.83673
2005	5.799	7.425	7.238	7.253	5.34	6.178	5.62393	7.10492	6.86641	6.96238	5.06427	5.80708
2006	5.424	6.952	6.934	7.083	5.062	5.871	5.45638	6.93704	6.69928	6.79074	4.98939	5.77666
2007	4.949	6.49	6.125	6.437	4.728	5.586	5.28849	6.76872	6.53146	6.61897	4.91432	5.74572
2008	5.018	6.379	6.01	6.438	4.779	5.377	5.12054	6.60025	6.36341	6.44719	4.83922	5.71456

## Sheet: Figure 2
	Figure 2(a)						Figure 2(b)						Figure 2(c)						Figure 2(d)
year	rls-a-hpt	sls-a-1	sls-a-2	sls-a-3	sls-a-4	sls-a-5	rls-m-hpt	sls-m-1	sls-m-2	sls-a-3	sls-a-4	sls-a-5	rls-s-hpt	sls-s-1	sls-s-2	sls-s-3	sls-s-4	sls-s-5	rei-hpt	sei-1	sei-2	sei-3	sei-4	sei-5
1850	0.748974	0.75	0.75	0.75	0.75	0.75	0.138	0.15	0.15	0.15	0.15	0.15	0.113022	0.1	0.1	0.1	0.1	0.1	0.174926	0.79839	0.64145	0.85881	0.79839	0.79839
1851	0.746384	0.74365	0.74684	0.74043	0.74365	0.74365	0.140306	0.15364	0.15173	0.15557	0.15359	0.15369	0.113306	0.10271	0.10144	0.104	0.10276	0.10266	0.222701	0.80149	0.64395	0.86214	0.80149	0.80149
1852	0.743791	0.73719	0.74365	0.73063	0.73719	0.73719	0.142613	0.15733	0.15347	0.16126	0.15723	0.15743	0.113593	0.10548	0.10289	0.10811	0.10558	0.10538	0.270534	0.80456	0.64644	0.8654	0.80456	0.80456
1853	0.741187	0.73064	0.74044	0.72061	0.73064	0.73064	0.144926	0.16107	0.15521	0.16707	0.16092	0.16123	0.113884	0.10829	0.10435	0.11232	0.10844	0.10813	0.318519	0.80759	0.64892	0.86861	0.80759	0.80759
1854	0.738563	0.72398	0.7372	0.71036	0.72399	0.72398	0.147253	0.16487	0.15697	0.173	0.16465	0.16508	0.114182	0.11115	0.10583	0.11663	0.11136	0.11094	0.366764	0.8106	0.6514	0.87175	0.8106	0.81059
1855	0.735903	0.71723	0.73393	0.6999	0.71723	0.71722	0.149605	0.16871	0.15874	0.17905	0.16844	0.16899	0.11449	0.11406	0.10732	0.12105	0.11433	0.11379	0.415344	0.81357	0.65387	0.87483	0.81357	0.81356
1856	0.733196	0.71038	0.73065	0.68923	0.71039	0.71036	0.151992	0.17261	0.16052	0.18521	0.17226	0.17295	0.114811	0.11702	0.10883	0.12556	0.11735	0.11669	0.464309	0.8165	0.65633	0.87784	0.8165	0.8165
1857	0.730432	0.70343	0.72734	0.67835	0.70344	0.70341	0.154422	0.17655	0.16231	0.19147	0.17614	0.17695	0.115145	0.12003	0.11035	0.13018	0.12042	0.11963	0.513649	0.8194	0.65878	0.88079	0.8194	0.81939
1858	0.727599	0.69639	0.724	0.66728	0.69641	0.69637	0.156903	0.18053	0.16411	0.19784	0.18005	0.18101	0.115496	0.12308	0.11189	0.13488	0.12354	0.12262	0.563358	0.82226	0.66122	0.88366	0.82227	0.82225
1859	0.724688	0.68926	0.72064	0.65603	0.68928	0.68923	0.159445	0.18456	0.16592	0.20429	0.18401	0.18512	0.115866	0.12618	0.11344	0.13967	0.12671	0.12565	0.613475	0.82508	0.66365	0.88647	0.82509	0.82507
1860	0.721694	0.68204	0.71725	0.64461	0.68207	0.682	0.162048	0.18863	0.16774	0.21084	0.188	0.18927	0.116258	0.12933	0.115	0.14455	0.12993	0.12873	0.664038	0.82786	0.66608	0.88919	0.82787	0.82785
1861	0.718613	0.67473	0.71385	0.63302	0.67477	0.67469	0.164711	0.19275	0.16957	0.21747	0.19203	0.19346	0.116676	0.13252	0.11658	0.14951	0.13319	0.13185	0.71516	0.83061	0.66849	0.89184	0.83062	0.83059
1862	0.715446	0.66734	0.71041	0.62128	0.66739	0.66729	0.167435	0.1969	0.17141	0.22417	0.1961	0.1977	0.117119	0.13575	0.11818	0.15455	0.13651	0.135	0.766976	0.83331	0.6709	0.89442	0.83332	0.83329
1863	0.712191	0.65987	0.70696	0.6094	0.65993	0.65981	0.170218	0.2011	0.17325	0.23094	0.2002	0.20198	0.11759	0.13903	0.11978	0.15967	0.13986	0.1382	0.819752	0.83597	0.67329	0.89691	0.83599	0.83595
1864	0.708847	0.65232	0.70348	0.59739	0.65239	0.65226	0.17306	0.20532	0.17511	0.23776	0.20434	0.2063	0.118093	0.14235	0.12141	0.16485	0.14327	0.14144	0.873883	0.83858	0.67568	0.89932	0.83861	0.83856
1865	0.705414	0.6447	0.69998	0.58527	0.64478	0.64462	0.175956	0.20958	0.17697	0.24464	0.2085	0.21066	0.118631	0.14572	0.12304	0.17009	0.14672	0.14472	0.929814	0.84115	0.67805	0.90164	0.84118	0.84113
1866	0.701886	0.63701	0.69646	0.57304	0.6371	0.63691	0.178907	0.21388	0.17885	0.25156	0.2127	0.21505	0.119207	0.14912	0.12469	0.17539	0.15021	0.14803	0.98805	0.84368	0.68041	0.90388	0.84371	0.84365
1867	0.698259	0.62924	0.69292	0.56074	0.62935	0.62914	0.181916	0.2182	0.18073	0.25852	0.21692	0.21948	0.119826	0.15256	0.12636	0.18075	0.15374	0.15138	1.04912	0.84616	0.68276	0.90604	0.84619	0.84612
1868	0.694524	0.62142	0.68935	0.54836	0.62153	0.6213	0.184989	0.22255	0.18261	0.2655	0.22116	0.22394	0.120488	0.15604	0.12804	0.18615	0.15731	0.15476	1.11355	0.84859	0.6851	0.90811	0.84863	0.84855
1869	0.69068	0.61353	0.68576	0.53592	0.61366	0.61339	0.188124	0.22692	0.18451	0.27249	0.22542	0.22842	0.121197	0.15955	0.12973	0.19159	0.16092	0.15818	1.18181	0.85098	0.68743	0.91009	0.85102	0.85093
1870	0.686725	0.60558	0.68215	0.52345	0.60573	0.60543	0.191319	0.23132	0.18641	0.27949	0.2297	0.23294	0.121957	0.1631	0.13143	0.19706	0.16457	0.16163	1.25439	0.85331	0.68974	0.91197	0.85336	0.85326
1871	0.682665	0.59758	0.67853	0.51094	0.59774	0.59742	0.194565	0.23574	0.18832	0.28649	0.234	0.23748	0.122771	0.16668	0.13315	0.20256	0.16825	0.16511	1.3317	0.8556	0.69205	0.91377	0.85566	0.85554
1872	0.678514	0.58953	0.67488	0.49843	0.58971	0.58935	0.197845	0.24018	0.19024	0.29348	0.23832	0.24204	0.123642	0.17029	0.13488	0.20809	0.17197	0.16862	1.41402	0.85783	0.69434	0.91548	0.8579	0.85777
1873	0.674293	0.58144	0.6712	0.48593	0.58163	0.58124	0.201139	0.24463	0.19216	0.30045	0.24264	0.24661	0.124569	0.17393	0.13663	0.21362	0.17572	0.17215	1.50156	0.86002	0.69661	0.9171	0.86009	0.85994
1874	0.670032	0.5733	0.66752	0.47344	0.57352	0.57308	0.204419	0.2491	0.19409	0.30739	0.24697	0.25121	0.12555	0.17761	0.13839	0.21917	0.17951	0.17571	1.59453	0.86215	0.69888	0.91863	0.86223	0.86207
1875	0.66576	0.56512	0.66381	0.461	0.56536	0.56489	0.207659	0.25357	0.19603	0.31429	0.25132	0.25582	0.126582	0.1813	0.14016	0.22472	0.18332	0.17929	1.69305	0.86423	0.70113	0.92006	0.86432	0.86414
1876	0.661502	0.55692	0.66008	0.4486	0.55718	0.55666	0.210838	0.25805	0.19797	0.32114	0.25566	0.26044	0.127661	0.18503	0.14195	0.23026	0.18716	0.1829	1.79718	0.86626	0.70336	0.9214	0.86636	0.86616
1877	0.657283	0.54868	0.65633	0.43628	0.54896	0.5484	0.213937	0.26254	0.19992	0.32793	0.26001	0.26507	0.12878	0.18877	0.14375	0.23579	0.19103	0.18652	1.90708	0.86823	0.70558	0.92265	0.86834	0.86812
1878	0.653119	0.54042	0.65256	0.42403	0.54073	0.54012	0.216946	0.26703	0.20188	0.33466	0.26435	0.26971	0.129936	0.19254	0.14556	0.2413	0.19492	0.19017	2.02295	0.87015	0.70779	0.92381	0.87027	0.87003
1879	0.649022	0.53214	0.64878	0.41189	0.53247	0.53182	0.219859	0.27153	0.20383	0.34132	0.26869	0.27435	0.13112	0.19633	0.14738	0.24679	0.19884	0.19383	2.14504	0.87202	0.70998	0.92488	0.87215	0.87188
1880	0.644988	0.52385	0.64498	0.39985	0.5242	0.5235	0.222683	0.27601	0.2058	0.3479	0.27302	0.279	0.132329	0.20013	0.14922	0.25225	0.20278	0.1975	2.27349	0.87383	0.71216	0.92586	0.87397	0.87368
1881	0.641002	0.51555	0.64116	0.38794	0.51592	0.51517	0.225443	0.2805	0.20777	0.35438	0.27735	0.28364	0.133556	0.20396	0.15107	0.25768	0.20673	0.20119	2.4082	0.87558	0.71432	0.92675	0.87574	0.87542
1882	0.637042	0.50724	0.63733	0.37616	0.50763	0.50684	0.228161	0.28497	0.20974	0.36078	0.28166	0.28828	0.134798	0.20779	0.15293	0.26306	0.2107	0.20489	2.54906	0.87728	0.71647	0.92755	0.87745	0.87711
1883	0.633085	0.49893	0.63348	0.36453	0.49935	0.4985	0.230863	0.28944	0.21172	0.36707	0.28596	0.2929	0.136052	0.21164	0.15481	0.2684	0.21469	0.20859	2.69585	0.87892	0.7186	0.92826	0.87911	0.87873
1884	0.629114	0.49062	0.62961	0.35306	0.49107	0.49017	0.233566	0.29389	0.2137	0.37325	0.29024	0.29752	0.13732	0.21549	0.15669	0.27369	0.21869	0.21231	2.84836	0.8805	0.72071	0.92888	0.88071	0.8803
1885	0.625115	0.48232	0.62573	0.34176	0.48279	0.48184	0.236284	0.29832	0.21568	0.37932	0.29451	0.30213	0.138601	0.21936	0.15859	0.27892	0.2227	0.21603	3.00634	0.88203	0.72281	0.92942	0.88225	0.88182
1886	0.621079	0.47403	0.62183	0.33064	0.47453	0.47353	0.23902	0.30274	0.21767	0.38527	0.29875	0.30672	0.1399	0.22323	0.1605	0.28409	0.22672	0.21975	3.16945	0.8835	0.72489	0.92987	0.88374	0.88327
1887	0.616998	0.46576	0.61792	0.31972	0.46629	0.46523	0.241782	0.30713	0.21966	0.39109	0.30296	0.3113	0.141221	0.22711	0.16242	0.28919	0.23075	0.22347	3.33734	0.88492	0.72696	0.93024	0.88517	0.88467
1888	0.612849	0.45751	0.61399	0.30899	0.45807	0.45695	0.244585	0.31151	0.22165	0.39679	0.30715	0.31585	0.142566	0.23098	0.16436	0.29422	0.23478	0.2272	3.5095	0.88628	0.72901	0.93053	0.88655	0.88601
1889	0.608613	0.44929	0.61005	0.29846	0.44987	0.4487	0.247447	0.31585	0.22365	0.40235	0.31131	0.32038	0.14394	0.23486	0.1663	0.29919	0.23882	0.23092	3.68523	0.88758	0.73104	0.93074	0.88787	0.88729
1890	0.604268	0.44109	0.6061	0.28815	0.44171	0.44048	0.250383	0.32017	0.22564	0.40778	0.31543	0.32489	0.145348	0.23874	0.16826	0.30407	0.24286	0.23463	3.86374	0.88882	0.73305	0.93087	0.88913	0.88851
1891	0.599796	0.43294	0.60213	0.27805	0.43358	0.43229	0.25341	0.32445	0.22764	0.41307	0.31952	0.32937	0.146794	0.24261	0.17022	0.30888	0.2469	0.23834	4.04437	0.89	0.73505	0.93092	0.89033	0.88967
1892	0.595177	0.42482	0.59816	0.26818	0.42549	0.42415	0.256542	0.3287	0.22964	0.41821	0.32358	0.33381	0.148282	0.24648	0.1722	0.3136	0.25093	0.24204	4.22644	0.89113	0.73702	0.9309	0.89148	0.89078
1893	0.590401	0.41674	0.59417	0.25854	0.41744	0.41604	0.259783	0.33292	0.23164	0.42322	0.3276	0.33823	0.149816	0.25034	0.17419	0.31824	0.25496	0.24573	4.4092	0.8922	0.73898	0.9308	0.89258	0.89183
1894	0.585466	0.40871	0.59017	0.24913	0.40944	0.40798	0.263131	0.3371	0.23365	0.42807	0.33157	0.3426	0.151403	0.25419	0.17619	0.3228	0.25899	0.24941	4.59175	0.89322	0.74092	0.93064	0.89362	0.89282
1895	0.580377	0.40073	0.58616	0.23995	0.40149	0.39998	0.266574	0.34123	0.23565	0.43278	0.3355	0.34695	0.153049	0.25804	0.17819	0.32726	0.263	0.25308	4.77291	0.89418	0.74284	0.9304	0.8946	0.89375
1896	0.575147	0.39281	0.58214	0.23102	0.3936	0.39202	0.270094	0.34533	0.23765	0.43734	0.33939	0.35125	0.154759	0.26186	0.18021	0.33164	0.26701	0.25673	4.95154	0.89508	0.74475	0.9301	0.89553	0.89463
1897	0.569792	0.38494	0.5781	0.22231	0.38576	0.38413	0.273669	0.34938	0.23965	0.44176	0.34323	0.35551	0.15654	0.26568	0.18224	0.33593	0.27101	0.26036	5.12633	0.89592	0.74663	0.92973	0.8964	0.89545
1898	0.564332	0.37714	0.57407	0.21385	0.37799	0.3763	0.277272	0.35338	0.24166	0.44602	0.34702	0.35972	0.158396	0.26948	0.18428	0.34012	0.27499	0.26398	5.29574	0.89671	0.7485	0.92929	0.89721	0.89621
1899	0.558793	0.3694	0.57002	0.20563	0.37028	0.36853	0.280874	0.35734	0.24366	0.45014	0.35076	0.36389	0.160334	0.27326	0.18633	0.34423	0.27896	0.26757	5.45808	0.89745	0.75034	0.92879	0.89798	0.89692
1900	0.553197	0.36174	0.56596	0.19765	0.36264	0.36084	0.284446	0.36124	0.24566	0.45411	0.35445	0.36802	0.162359	0.27702	0.18838	0.34824	0.28291	0.27115	5.61147	0.89812	0.75216	0.92824	0.89868	0.89757
1901	0.547566	0.35414	0.5619	0.1899	0.35507	0.35322	0.287963	0.3651	0.24766	0.45794	0.35809	0.37209	0.164472	0.28076	0.19045	0.35216	0.28684	0.2747	5.75436	0.89875	0.75397	0.92762	0.89934	0.89816
1902	0.541919	0.34662	0.55783	0.1824	0.34758	0.34567	0.291406	0.3689	0.24965	0.46162	0.36167	0.37611	0.166676	0.28448	0.19252	0.35598	0.29075	0.27822	5.88545	0.89932	0.75575	0.92696	0.89994	0.8987
1903	0.536273	0.33918	0.55375	0.17513	0.34017	0.3382	0.294756	0.37265	0.25165	0.46516	0.36519	0.38008	0.168972	0.28817	0.1946	0.35972	0.29464	0.28172	6.00336	0.89984	0.75752	0.92623	0.90049	0.89918
1904	0.530649	0.33182	0.54967	0.16809	0.33283	0.33081	0.297994	0.37634	0.25364	0.46856	0.36866	0.384	0.171358	0.29184	0.19669	0.36336	0.29851	0.28519	6.1067	0.9003	0.75926	0.92546	0.90099	0.89961
1905	0.52506	0.32454	0.54558	0.16128	0.32558	0.32351	0.301106	0.37997	0.25563	0.47181	0.37206	0.38785	0.173836	0.29549	0.19879	0.36691	0.30235	0.28864	6.19419	0.90071	0.76099	0.92463	0.90143	0.89999
1906	0.519514	0.31735	0.54148	0.15469	0.31842	0.31629	0.304085	0.38354	0.25762	0.47493	0.37541	0.39166	0.176402	0.2991	0.2009	0.37037	0.30617	0.29205	6.26472	0.90107	0.76269	0.92376	0.90182	0.90032
1907	0.514012	0.31025	0.53739	0.14833	0.31134	0.30917	0.306934	0.38706	0.2596	0.47792	0.37869	0.3954	0.179056	0.30269	0.20301	0.37375	0.30997	0.29543	6.31732	0.90138	0.76437	0.92284	0.90217	0.90059
1908	0.508546	0.30324	0.53329	0.14219	0.30435	0.30213	0.309661	0.39051	0.26158	0.48077	0.38192	0.39909	0.181794	0.30625	0.20514	0.37703	0.31373	0.29878	6.35124	0.90163	0.76603	0.92187	0.90246	0.90081
1909	0.503107	0.29632	0.52918	0.13627	0.29746	0.29519	0.312281	0.39391	0.26355	0.4835	0.38507	0.40271	0.184613	0.30978	0.20726	0.38023	0.31747	0.3021	6.36614	0.90184	0.76767	0.92086	0.90271	0.90098
1910	0.497686	0.2895	0.52508	0.13055	0.29066	0.28834	0.314804	0.39724	0.26552	0.4861	0.38817	0.40628	0.187511	0.31327	0.2094	0.38335	0.32117	0.30538	6.3626	0.902	0.76929	0.91981	0.9029	0.9011
1911	0.49228	0.28277	0.52097	0.12505	0.28395	0.28159	0.317236	0.4005	0.26749	0.48857	0.3912	0.40978	0.190485	0.31673	0.21154	0.38638	0.32485	0.30863	6.34169	0.90211	0.77088	0.91873	0.90305	0.90117
1912	0.486884	0.27614	0.51686	0.11974	0.27734	0.27494	0.319581	0.4037	0.26945	0.49093	0.39417	0.41322	0.193535	0.32016	0.21369	0.38933	0.32849	0.31185	6.30501	0.90217	0.77246	0.9176	0.90315	0.90119
1913	0.481499	0.26961	0.51275	0.11464	0.27083	0.26839	0.321843	0.40684	0.27141	0.49316	0.39707	0.41659	0.19666	0.32355	0.21585	0.3922	0.3321	0.31502	6.25448	0.90218	0.77401	0.91644	0.90321	0.90116
1914	0.476118	0.26317	0.50863	0.10972	0.26442	0.26194	0.324029	0.40992	0.27336	0.49529	0.3999	0.4199	0.199854	0.32691	0.21801	0.39499	0.33568	0.31816	6.19262	0.90215	0.77554	0.91525	0.90322	0.90109
1915	0.470734	0.25685	0.50452	0.10499	0.25811	0.25559	0.326155	0.41292	0.2753	0.4973	0.40267	0.42315	0.203112	0.33023	0.22017	0.39771	0.33922	0.32126	6.12294	0.90208	0.77705	0.91402	0.90319	0.90097
1916	0.465333	0.25062	0.50041	0.10045	0.25191	0.24934	0.328246	0.41586	0.27724	0.4992	0.40537	0.42633	0.206422	0.33352	0.22234	0.40035	0.34273	0.32433	6.04952	0.90195	0.77853	0.91276	0.90311	0.9008
1917	0.459902	0.2445	0.4963	0.09608	0.2458	0.2432	0.330329	0.41874	0.27917	0.501	0.408	0.42945	0.209769	0.33676	0.22452	0.40292	0.3462	0.32735	5.97708	0.90179	0.77999	0.91148	0.90299	0.90059
1918	0.454426	0.23848	0.4922	0.09188	0.2398	0.23717	0.332439	0.42155	0.2811	0.5027	0.41057	0.4325	0.213135	0.33997	0.2267	0.40542	0.34963	0.33034	5.91092	0.90158	0.78143	0.91016	0.90283	0.90034
1919	0.448893	0.23256	0.48809	0.08785	0.2339	0.23124	0.334606	0.42429	0.28302	0.5043	0.41307	0.43548	0.216501	0.34315	0.22889	0.40785	0.35303	0.33328	5.85469	0.90133	0.78285	0.90882	0.90262	0.90004
1920	0.443291	0.22675	0.48399	0.08398	0.22811	0.22541	0.336858	0.42697	0.28493	0.5058	0.4155	0.4384	0.219851	0.34628	0.23108	0.41021	0.35639	0.33619	5.81086	0.90103	0.78425	0.90745	0.90238	0.8997
1921	0.437609	0.22105	0.47989	0.08027	0.22242	0.21969	0.339222	0.42958	0.28683	0.50721	0.41787	0.44125	0.22317	0.34937	0.23328	0.41251	0.35971	0.33905	5.7806	0.9007	0.78562	0.90606	0.90209	0.89932
1922	0.43183	0.21545	0.4758	0.07671	0.21683	0.21408	0.341722	0.43212	0.28873	0.50854	0.42017	0.44404	0.226448	0.35243	0.23548	0.41475	0.363	0.34188	5.76444	0.90033	0.78697	0.90465	0.90177	0.89889
1923	0.425951	0.20996	0.47171	0.0733	0.21135	0.20857	0.344376	0.4346	0.29061	0.50978	0.42241	0.44676	0.229674	0.35544	0.23768	0.41693	0.36624	0.34466	5.76126	0.89992	0.7883	0.90322	0.90141	0.89843
1924	0.419971	0.20457	0.46762	0.07003	0.20597	0.20317	0.347189	0.43701	0.29249	0.51093	0.42457	0.44942	0.232839	0.35842	0.23989	0.41904	0.36945	0.34741	5.76918	0.89947	0.7896	0.90176	0.90101	0.89793
1925	0.413897	0.19928	0.46354	0.06689	0.2007	0.19788	0.350158	0.43936	0.29436	0.51201	0.42668	0.45201	0.235945	0.36135	0.2421	0.4211	0.37262	0.35011	5.78602	0.89898	0.79088	0.90029	0.90057	0.89739
1926	0.407735	0.19411	0.45947	0.06389	0.19553	0.19269	0.353275	0.44164	0.29622	0.51301	0.42872	0.45454	0.23899	0.36425	0.24431	0.42311	0.37575	0.35277	5.80974	0.89846	0.79214	0.8988	0.9001	0.89682
1927	0.401492	0.18903	0.45541	0.06101	0.19047	0.18761	0.35654	0.44386	0.29807	0.51393	0.43069	0.457	0.241967	0.36711	0.24652	0.42506	0.37884	0.35539	5.83798	0.8979	0.79337	0.89729	0.8996	0.89621
1928	0.395175	0.18406	0.45135	0.05826	0.18551	0.18263	0.359957	0.44602	0.29991	0.51479	0.4326	0.4594	0.244867	0.36992	0.24874	0.42696	0.38189	0.35797	5.86784	0.89731	0.79458	0.89577	0.89906	0.89556
1929	0.388786	0.1792	0.4473	0.05562	0.18065	0.17776	0.363529	0.44811	0.30174	0.51557	0.43444	0.46173	0.247685	0.3727	0.25096	0.42881	0.38491	0.36051	5.89692	0.89668	0.79577	0.89423	0.89849	0.89488
1930	0.382324	0.17443	0.44326	0.0531	0.17589	0.17299	0.367261	0.45013	0.30356	0.51629	0.43623	0.464	0.250414	0.37543	0.25318	0.43061	0.38788	0.36301	5.92277	0.89602	0.79693	0.89267	0.89789	0.89416
1931	0.375785	0.16977	0.43922	0.05068	0.17123	0.16832	0.371163	0.4521	0.30537	0.51695	0.43795	0.46621	0.253051	0.37813	0.25541	0.43237	0.39082	0.36547	5.9434	0.89533	0.79807	0.89111	0.89725	0.89342
1932	0.369152	0.16521	0.4352	0.04837	0.16668	0.16376	0.375248	0.454	0.30717	0.51755	0.43961	0.46836	0.255599	0.38079	0.25763	0.43408	0.39371	0.36788	5.95708	0.89461	0.79919	0.88953	0.89659	0.89264
1933	0.362404	0.16075	0.43118	0.04616	0.16222	0.1593	0.379531	0.45585	0.30896	0.51808	0.44121	0.47044	0.258064	0.3834	0.25986	0.43575	0.39657	0.37026	5.96241	0.89385	0.80028	0.88794	0.89589	0.89183
1934	0.355524	0.15639	0.42718	0.04405	0.15786	0.15493	0.384016	0.45763	0.31073	0.51857	0.44275	0.47247	0.260459	0.38598	0.26209	0.43738	0.39939	0.3726	5.95848	0.89307	0.80135	0.88634	0.89517	0.89099
1935	0.348503	0.15213	0.42319	0.04203	0.1536	0.15067	0.388691	0.45935	0.3125	0.519	0.44423	0.47443	0.262805	0.38852	0.26431	0.43897	0.40217	0.3749	5.94486	0.89226	0.8024	0.88473	0.89442	0.89012
1936	0.341336	0.14796	0.41921	0.04011	0.14944	0.1465	0.393538	0.46102	0.31425	0.51937	0.44565	0.47634	0.265126	0.39102	0.26654	0.44052	0.40491	0.37716	5.92174	0.89142	0.80342	0.88312	0.89364	0.88922
1937	0.334023	0.14389	0.41524	0.03826	0.14537	0.14243	0.398533	0.46262	0.31599	0.5197	0.44701	0.47819	0.267443	0.39349	0.26877	0.44204	0.40762	0.37938	5.88995	0.89056	0.80442	0.88149	0.89283	0.88829
1938	0.326565	0.13992	0.41128	0.0365	0.1414	0.13846	0.403659	0.46417	0.31772	0.51998	0.44832	0.47998	0.269776	0.39591	0.271	0.44352	0.41028	0.38156	5.85123	0.88966	0.80539	0.87986	0.892	0.88734
1939	0.318964	0.13604	0.40734	0.03482	0.13752	0.13458	0.408896	0.46566	0.31944	0.52022	0.44957	0.48171	0.272139	0.3983	0.27323	0.44496	0.41291	0.38371	5.8088	0.88875	0.80634	0.87822	0.89115	0.88636
1940	0.311225	0.13225	0.4034	0.03321	0.13372	0.13079	0.414233	0.4671	0.32114	0.52041	0.45077	0.48339	0.274542	0.40065	0.27545	0.44638	0.4155	0.38582	5.76683	0.8878	0.80727	0.87657	0.89027	0.88535
1941	0.303352	0.12855	0.39949	0.03167	0.13003	0.1271	0.41966	0.46849	0.32283	0.52057	0.45191	0.48501	0.276987	0.40296	0.27768	0.44776	0.41806	0.38789	5.73061	0.88684	0.80818	0.87492	0.88937	0.88432
1942	0.295362	0.12494	0.39558	0.03021	0.12641	0.1235	0.42516	0.46982	0.32451	0.52068	0.453	0.48658	0.279478	0.40524	0.27991	0.44911	0.42058	0.38992	5.70504	0.88585	0.80906	0.87326	0.88844	0.88327
1943	0.287278	0.12143	0.39169	0.02881	0.12289	0.11998	0.430705	0.47109	0.32618	0.52075	0.45404	0.4881	0.282016	0.40748	0.28213	0.45044	0.42307	0.39192	5.69406	0.88484	0.80992	0.8716	0.8875	0.88219
1944	0.279131	0.11799	0.38782	0.02747	0.11945	0.11655	0.436266	0.47232	0.32783	0.52079	0.45503	0.48956	0.284603	0.40969	0.28435	0.45173	0.42551	0.39388	5.70047	0.8838	0.81075	0.86993	0.88653	0.8811
1945	0.270948	0.11465	0.38396	0.0262	0.1161	0.11321	0.441815	0.4735	0.32946	0.5208	0.45597	0.49098	0.287237	0.41186	0.28657	0.453	0.42793	0.39581	5.72625	0.88275	0.81157	0.86826	0.88554	0.87998
1946	0.262756	0.11138	0.38012	0.02498	0.11283	0.10996	0.447325	0.47462	0.33109	0.52077	0.45686	0.49234	0.289919	0.41399	0.28879	0.45425	0.43031	0.3977	5.77207	0.88167	0.81235	0.86658	0.88453	0.87884
1947	0.254584	0.1082	0.37629	0.02382	0.10965	0.10678	0.452772	0.4757	0.3327	0.52071	0.4577	0.49365	0.292645	0.4161	0.29101	0.45547	0.43266	0.39956	5.83608	0.88058	0.81312	0.86491	0.8835	0.87767
1948	0.246453	0.1051	0.37248	0.02271	0.10654	0.10369	0.458134	0.47673	0.33429	0.52062	0.45849	0.49492	0.295413	0.41817	0.29323	0.45667	0.43497	0.40139	5.9155	0.87947	0.81386	0.86323	0.88246	0.87649
1949	0.23838	0.10208	0.36869	0.02165	0.10351	0.10068	0.463394	0.47771	0.33587	0.5205	0.45924	0.49614	0.298227	0.4202	0.29544	0.45784	0.43725	0.40318	6.00734	0.87833	0.81458	0.86155	0.8814	0.8753
1950	0.230376	0.09914	0.36492	0.02064	0.10057	0.09775	0.468532	0.47865	0.33744	0.52036	0.45994	0.49731	0.301093	0.42221	0.29765	0.459	0.4395	0.40494	6.1088	0.87719	0.81528	0.85987	0.88032	0.87408
1951	0.222452	0.09628	0.36116	0.01968	0.09769	0.09489	0.473527	0.47954	0.33899	0.52018	0.4606	0.49844	0.304021	0.42418	0.29985	0.46013	0.44171	0.40667	6.2167	0.87602	0.81595	0.85818	0.87922	0.87284
1952	0.21462	0.09349	0.35742	0.01876	0.09489	0.09211	0.478354	0.48039	0.34052	0.51999	0.46121	0.49952	0.307026	0.42612	0.30206	0.46125	0.4439	0.40837	6.32806	0.87484	0.8166	0.8565	0.87811	0.87159
1953	0.20689	0.09077	0.3537	0.01789	0.09217	0.0894	0.482986	0.48119	0.34204	0.51977	0.46178	0.50056	0.310124	0.42803	0.30426	0.46235	0.44605	0.41004	6.44046	0.87364	0.81723	0.85481	0.87698	0.87032
1954	0.199274	0.08813	0.35	0.01705	0.08952	0.08677	0.487394	0.48196	0.34355	0.51952	0.46231	0.50155	0.313332	0.42992	0.30645	0.46343	0.44817	0.41168	6.55207	0.87243	0.81783	0.85313	0.87584	0.86904
1955	0.191784	0.08556	0.34632	0.01625	0.08693	0.08421	0.491548	0.48268	0.34504	0.51926	0.4628	0.50251	0.316667	0.43177	0.30864	0.46449	0.45027	0.41329	6.66116	0.8712	0.81842	0.85144	0.87468	0.86774
1956	0.184434	0.08305	0.34265	0.01549	0.08442	0.08171	0.495416	0.48336	0.34651	0.51897	0.46325	0.50342	0.320149	0.43359	0.31083	0.46553	0.45233	0.41487	6.76593	0.86996	0.81897	0.84976	0.87351	0.86643
1957	0.177237	0.08061	0.33901	0.01477	0.08197	0.07929	0.498968	0.484	0.34797	0.51867	0.46367	0.50429	0.323795	0.43538	0.31302	0.46656	0.45436	0.41642	6.86501	0.8687	0.81951	0.84807	0.87233	0.8651
1958	0.170208	0.07824	0.33539	0.01408	0.07959	0.07693	0.502172	0.48461	0.34942	0.51834	0.46404	0.50513	0.327619	0.43715	0.3152	0.46758	0.45637	0.41794	6.95787	0.86743	0.82003	0.84639	0.87113	0.86376
1959	0.163362	0.07594	0.33179	0.01342	0.07727	0.07463	0.505003	0.48517	0.35084	0.518	0.46438	0.50592	0.331635	0.43889	0.31737	0.46858	0.45835	0.41944	7.04443	0.86615	0.82052	0.8447	0.86993	0.86241
1960	0.156715	0.0737	0.32821	0.01279	0.07502	0.0724	0.507435	0.4857	0.35225	0.51764	0.46468	0.50668	0.33585	0.4406	0.31954	0.46957	0.4603	0.42091	7.12475	0.86486	0.82099	0.84302	0.86871	0.86104
1961	0.15028	0.07152	0.32465	0.01219	0.07282	0.07024	0.509452	0.4862	0.35365	0.51726	0.46495	0.50741	0.340267	0.44228	0.32171	0.47054	0.46223	0.42236	7.19837	0.86356	0.82144	0.84134	0.86748	0.85967
1962	0.144072	0.0694	0.32111	0.01162	0.07069	0.06813	0.511045	0.48666	0.35503	0.51687	0.46518	0.5081	0.344882	0.44394	0.32387	0.47151	0.46413	0.42378	7.26492	0.86224	0.82187	0.83966	0.86624	0.85828
1963	0.138103	0.06734	0.31759	0.01108	0.06862	0.06608	0.512209	0.48709	0.35639	0.51647	0.46538	0.50875	0.349687	0.44558	0.32602	0.47246	0.466	0.42517	7.32381	0.86092	0.82227	0.83799	0.86499	0.85688
1964	0.132383	0.06533	0.31409	0.01056	0.0666	0.06409	0.51295	0.48748	0.35774	0.51605	0.46555	0.50937	0.354666	0.44719	0.32817	0.4734	0.46785	0.42654	7.37434	0.85958	0.82266	0.83631	0.86373	0.85547
1965	0.126922	0.06338	0.31062	0.01006	0.06464	0.06216	0.513275	0.48784	0.35907	0.51561	0.46568	0.50996	0.359802	0.44878	0.33031	0.47432	0.46967	0.42789	7.41573	0.85824	0.82302	0.83464	0.86247	0.85405
1966	0.121724	0.06149	0.30717	0.00959	0.06274	0.06028	0.513198	0.48817	0.36038	0.51517	0.46579	0.51051	0.365076	0.45034	0.33245	0.47524	0.47148	0.42921	7.44712	0.85689	0.82336	0.83297	0.86119	0.85262
1967	0.116793	0.05965	0.30374	0.00914	0.06088	0.05845	0.51274	0.48847	0.36168	0.51471	0.46586	0.51104	0.370466	0.45188	0.33458	0.47615	0.47325	0.43051	7.46753	0.85553	0.82368	0.8313	0.8599	0.85119
1968	0.112128	0.05787	0.30034	0.00871	0.05908	0.05668	0.511921	0.48874	0.36296	0.51424	0.46591	0.51153	0.375949	0.45339	0.33671	0.47705	0.47501	0.43179	7.4762	0.85416	0.82398	0.82964	0.85861	0.84974
1969	0.107726	0.05613	0.29696	0.0083	0.05733	0.05496	0.510768	0.48898	0.36422	0.51376	0.46593	0.51199	0.381504	0.45489	0.33883	0.47794	0.47674	0.43305	7.47224	0.85278	0.82426	0.82798	0.85731	0.84829
1970	0.103583	0.05445	0.2936	0.00791	0.05563	0.05329	0.509306	0.48919	0.36546	0.51326	0.46592	0.51243	0.38711	0.45636	0.34094	0.47882	0.47845	0.43428	7.45492	0.8514	0.82452	0.82632	0.85601	0.84683
1971	0.0996928	0.05281	0.29026	0.00754	0.05398	0.05166	0.507561	0.48938	0.36669	0.51276	0.46588	0.51284	0.392745	0.45782	0.34305	0.47969	0.48014	0.4355	7.42378	0.85	0.82475	0.82466	0.85469	0.84536
1972	0.0960494	0.05122	0.28695	0.00719	0.05238	0.05009	0.505557	0.48953	0.36791	0.51225	0.46582	0.51322	0.398392	0.45925	0.34514	0.48056	0.4818	0.4367	7.37886	0.84861	0.82497	0.82301	0.85338	0.84388
1973	0.0926446	0.04967	0.28366	0.00685	0.05082	0.04856	0.503312	0.48967	0.3691	0.51173	0.46573	0.51357	0.404042	0.46066	0.34724	0.48142	0.48345	0.43787	7.32036	0.8472	0.82516	0.82136	0.85205	0.8424
1974	0.0894686	0.04817	0.2804	0.00653	0.0493	0.04707	0.500834	0.48977	0.37028	0.5112	0.46562	0.5139	0.409695	0.46205	0.34932	0.48227	0.48508	0.43903	7.24851	0.84579	0.82534	0.81972	0.85072	0.84091
1975	0.0865087	0.04672	0.27716	0.00622	0.04783	0.04563	0.498133	0.48986	0.37144	0.51066	0.46548	0.5142	0.415356	0.46343	0.3514	0.48311	0.48668	0.44017	7.16371	0.84438	0.8255	0.81807	0.84939	0.83942
1976	0.0837504	0.0453	0.27394	0.00593	0.04641	0.04423	0.495218	0.48992	0.37259	0.51012	0.46532	0.51448	0.421029	0.46478	0.35347	0.48395	0.48827	0.44129	7.06659	0.84296	0.82563	0.81643	0.84805	0.83792
1977	0.0811769	0.04393	0.27075	0.00565	0.04502	0.04287	0.492098	0.48995	0.37371	0.50957	0.46514	0.51474	0.426722	0.46612	0.35554	0.48478	0.48984	0.44239	6.95807	0.84153	0.82575	0.8148	0.8467	0.83641
1978	0.0787689	0.0426	0.26758	0.00539	0.04367	0.04155	0.488787	0.48996	0.37482	0.50901	0.46494	0.51497	0.432442	0.46744	0.35759	0.4856	0.49139	0.44348	6.83958	0.8401	0.82585	0.81317	0.84535	0.83491
1979	0.076506	0.0413	0.26444	0.00514	0.04236	0.04027	0.485295	0.48996	0.37592	0.50844	0.46471	0.51518	0.438196	0.46874	0.35964	0.48642	0.49292	0.44455	6.71293	0.83867	0.82593	0.81154	0.844	0.83339
1980	0.0743685	0.04005	0.26133	0.0049	0.04109	0.03903	0.481632	0.48993	0.37699	0.50787	0.46447	0.51537	0.443997	0.47003	0.36168	0.48724	0.49444	0.4456	6.57977	0.83723	0.82598	0.80992	0.84264	0.83187
1981	0.0723377	0.03883	0.25823	0.00467	0.03986	0.03783	0.477807	0.48987	0.37805	0.50729	0.4642	0.51554	0.449853	0.4713	0.36371	0.48805	0.49594	0.44663	6.4424	0.83579	0.82602	0.8083	0.84128	0.83035
1982	0.0703962	0.03765	0.25517	0.00445	0.03866	0.03666	0.473831	0.4898	0.37909	0.5067	0.46391	0.51568	0.455771	0.47255	0.36574	0.48885	0.49742	0.44766	6.30314	0.83435	0.82605	0.80668	0.83992	0.82883
1983	0.0685276	0.0365	0.25212	0.00424	0.0375	0.03553	0.469718	0.48971	0.38012	0.50611	0.46361	0.51581	0.461752	0.47379	0.36776	0.48965	0.49889	0.44866	6.1637	0.8329	0.82605	0.80507	0.83856	0.8273
1984	0.0667181	0.03539	0.24911	0.00404	0.03638	0.03443	0.465483	0.4896	0.38113	0.50551	0.46329	0.51592	0.467797	0.47501	0.36977	0.49044	0.50034	0.44965	6.02528	0.83145	0.82603	0.80346	0.83719	0.82576
1985	0.0649566	0.03431	0.24612	0.00385	0.03528	0.03336	0.461135	0.48948	0.38212	0.50491	0.46295	0.516	0.473907	0.47622	0.37177	0.49124	0.50177	0.45063	5.8887	0.82999	0.826	0.80186	0.83582	0.82423
1986	0.0632355	0.03326	0.24315	0.00367	0.03422	0.03233	0.456686	0.48933	0.38309	0.50431	0.46259	0.51607	0.480077	0.47741	0.37376	0.49202	0.50319	0.4516	5.75429	0.82854	0.82595	0.80026	0.83445	0.82269
1987	0.0615505	0.03224	0.24021	0.0035	0.03319	0.03133	0.452147	0.48917	0.38405	0.5037	0.46221	0.51613	0.4863	0.47859	0.37574	0.4928	0.5046	0.45255	5.62229	0.82708	0.82588	0.79867	0.83307	0.82115
1988	0.0598998	0.03126	0.23729	0.00333	0.03219	0.03036	0.447533	0.48899	0.38499	0.50308	0.46182	0.51616	0.492566	0.47975	0.37772	0.49358	0.50599	0.45348	5.49319	0.82562	0.82579	0.79708	0.8317	0.81961
1989	0.058281	0.0303	0.2344	0.00318	0.03122	0.02941	0.44286	0.48879	0.38591	0.50246	0.46142	0.51618	0.498858	0.48091	0.37969	0.49436	0.50737	0.45441	5.36724	0.82416	0.82569	0.79549	0.83032	0.81807
1990	0.056691	0.02937	0.23154	0.00303	0.03027	0.0285	0.43815	0.48858	0.38682	0.50184	0.46099	0.51618	0.505158	0.48205	0.38164	0.49513	0.50873	0.45532	5.2448	0.8227	0.82556	0.79391	0.82895	0.81652
1991	0.055125	0.02847	0.2287	0.00289	0.02936	0.02761	0.433433	0.48835	0.38771	0.50121	0.46056	0.51617	0.511441	0.48317	0.38359	0.4959	0.51008	0.45622	5.12607	0.82124	0.82543	0.79233	0.82757	0.81497
1992	0.0535767	0.0276	0.22589	0.00275	0.02847	0.02675	0.428739	0.48811	0.38858	0.50058	0.46011	0.51614	0.517683	0.48429	0.38553	0.49666	0.51142	0.45711	5.01111	0.81977	0.82527	0.79076	0.82619	0.81343
1993	0.0520392	0.02675	0.2231	0.00262	0.02761	0.02592	0.424098	0.48786	0.38943	0.49995	0.45964	0.5161	0.523862	0.48539	0.38747	0.49742	0.51275	0.45798	4.89976	0.81831	0.8251	0.78919	0.82481	0.81188
1994	0.0505061	0.02593	0.22034	0.0025	0.02678	0.02511	0.419532	0.48759	0.39027	0.49931	0.45916	0.51604	0.529961	0.48648	0.38939	0.49818	0.51406	0.45885	4.79163	0.81684	0.82491	0.78763	0.82343	0.81033
1995	0.0489739	0.02514	0.2176	0.00238	0.02597	0.02433	0.415053	0.4873	0.3911	0.49867	0.45867	0.51597	0.535972	0.48756	0.3913	0.49894	0.51536	0.4597	4.68632	0.81537	0.8247	0.78607	0.82205	0.80878
1996	0.0474419	0.02436	0.21489	0.00227	0.02518	0.02357	0.410661	0.487	0.3919	0.49803	0.45817	0.51588	0.541896	0.48863	0.39321	0.4997	0.51665	0.46055	4.58336	0.81391	0.82448	0.78452	0.82067	0.80722
1997	0.045911	0.02361	0.2122	0.00217	0.02442	0.02284	0.406352	0.4867	0.39269	0.49739	0.45765	0.51578	0.547736	0.48969	0.39511	0.50045	0.51793	0.46138	4.48233	0.81244	0.82424	0.78297	0.81929	0.80567
1998	0.0443841	0.02289	0.20954	0.00207	0.02368	0.02212	0.402117	0.48637	0.39346	0.49674	0.45712	0.51567	0.553498	0.49074	0.39699	0.5012	0.5192	0.4622	4.3828	0.81098	0.82399	0.78142	0.81791	0.80412
1999	0.0428641	0.02218	0.20691	0.00197	0.02296	0.02143	0.397949	0.48604	0.39422	0.49609	0.45658	0.51555	0.559186	0.49178	0.39887	0.50194	0.52045	0.46302	4.28436	0.80951	0.82372	0.77988	0.81653	0.80257
2000	0.0413536	0.0215	0.2043	0.00188	0.02227	0.02076	0.393844	0.48569	0.39496	0.49543	0.45603	0.51541	0.564802	0.4928	0.40074	0.50269	0.5217	0.46382	4.18665	0.80804	0.82344	0.77834	0.81515	0.80102
2001	0.0398547	0.02084	0.20172	0.00179	0.02159	0.02011	0.389797	0.48534	0.39568	0.49478	0.45547	0.51527	0.570348	0.49382	0.4026	0.50343	0.52294	0.46462	4.08929	0.80658	0.82314	0.77681	0.81377	0.79947
2002	0.0383699	0.0202	0.19916	0.00171	0.02094	0.01949	0.3858	0.48497	0.39639	0.49412	0.4549	0.51511	0.57583	0.49483	0.40445	0.50417	0.52416	0.46541	3.99177	0.80511	0.82283	0.77529	0.8124	0.79791
2003	0.0369006	0.01958	0.19663	0.00163	0.0203	0.01888	0.381844	0.48459	0.39708	0.49346	0.45431	0.51494	0.581255	0.49583	0.40629	0.50491	0.52538	0.46619	3.89371	0.80365	0.8225	0.77376	0.81102	0.79636
2004	0.0354471	0.01897	0.19412	0.00155	0.01969	0.01829	0.377922	0.4842	0.39776	0.4928	0.45372	0.51476	0.58663	0.49682	0.40813	0.50565	0.52659	0.46696	3.79495	0.80219	0.82215	0.77225	0.80965	0.79481
2005	0.0340088	0.01839	0.19164	0.00148	0.01909	0.01771	0.374025	0.4838	0.39842	0.49214	0.45312	0.51457	0.591965	0.49781	0.40995	0.50638	0.52779	0.46772	3.69554	0.80072	0.8218	0.77073	0.80827	0.79327
2006	0.0325846	0.01782	0.18918	0.00141	0.01851	0.01716	0.370144	0.4834	0.39906	0.49147	0.45251	0.51437	0.597271	0.49878	0.41176	0.50712	0.52898	0.46847	3.59563	0.79926	0.82142	0.76922	0.8069	0.79172
2007	0.0311722	0.01727	0.18675	0.00134	0.01795	0.01662	0.366271	0.48298	0.39969	0.49081	0.45189	0.51416	0.602556	0.49975	0.41357	0.50785	0.53016	0.46922	3.49546	0.7978	0.82104	0.76772	0.80553	0.79017
2008	0.029769	0.01674	0.18434	0.00128	0.01741	0.0161	0.362398	0.48255	0.4003	0.49014	0.45126	0.51394	0.607832	0.50071	0.41536	0.50858	0.53133	0.46996	3.39522	0.79635	0.82064	0.76622	0.80416	0.78863
2009	0.0283716	0.01622	0.18196	0.00122	0.01688	0.0156	0.358521	0.48212	0.4009	0.48947	0.45063	0.51371	0.613106	0.50166	0.41715	0.50931	0.53249	0.47069		0.79489	0.82023	0.76473	0.8028	0.78708
2010	0.0269764	0.01572	0.1796	0.00116	0.01637	0.01511	0.354643	0.48167	0.40148	0.4888	0.44998	0.51348	0.61838	0.5026	0.41892	0.51004	0.53365	0.47142		0.79344	0.8198	0.76324	0.80143	0.78554
2011		0.01524	0.17727	0.00111	0.01587	0.01463		0.48122	0.40204	0.48813	0.44933	0.51323		0.50354	0.42069	0.51076	0.5348	0.47213		0.79198	0.81936	0.76175	0.80007	0.784
2012		0.01477	0.17496	0.00106	0.01539	0.01417		0.48076	0.40259	0.48745	0.44867	0.51298		0.50447	0.42245	0.51149	0.53594	0.47285		0.79053	0.81891	0.76028	0.79871	0.78246
2013		0.01431	0.17268	0.00101	0.01492	0.01373		0.48029	0.40313	0.48678	0.448	0.51272		0.50539	0.42419	0.51221	0.53707	0.47355		0.78908	0.81844	0.7588	0.79735	0.78092
2014		0.01387	0.17042	0.00096	0.01447	0.0133		0.47982	0.40365	0.4861	0.44733	0.51245		0.50631	0.42593	0.51294	0.5382	0.47425		0.78764	0.81796	0.75733	0.79599	0.77938
2015		0.01344	0.16818	0.00092	0.01403	0.01288		0.47934	0.40416	0.48542	0.44665	0.51217		0.50722	0.42766	0.51366	0.53932	0.47494		0.78619	0.81747	0.75586	0.79464	0.77785
2016		0.01303	0.16597	0.00087	0.0136	0.01248		0.47885	0.40465	0.48475	0.44596	0.51189		0.50812	0.42938	0.51438	0.54043	0.47563		0.78475	0.81697	0.7544	0.79329	0.77632
2017		0.01263	0.16379	0.00083	0.01319	0.01209		0.47835	0.40512	0.48407	0.44527	0.5116		0.50902	0.43109	0.5151	0.54154	0.47631		0.78331	0.81646	0.75295	0.79194	0.77478
2018		0.01224	0.16162	0.0008	0.01279	0.01171		0.47785	0.40558	0.48339	0.44457	0.5113		0.50991	0.43279	0.51582	0.54264	0.47699		0.78187	0.81593	0.75149	0.79059	0.77326
2019		0.01186	0.15948	0.00076	0.0124	0.01134		0.47734	0.40603	0.48271	0.44386	0.511		0.5108	0.43449	0.51654	0.54373	0.47766		0.78043	0.81539	0.75005	0.78925	0.77173
2020		0.01149	0.15737	0.00072	0.01203	0.01098		0.47683	0.40646	0.48202	0.44315	0.51069		0.51168	0.43617	0.51725	0.54482	0.47833		0.779	0.81484	0.7486	0.78791	0.77021
2021		0.01114	0.15528	0.00069	0.01166	0.01064		0.47631	0.40688	0.48134	0.44244	0.51037		0.51255	0.43784	0.51797	0.5459	0.47899		0.77757	0.81428	0.74717	0.78657	0.76869
2022		0.01079	0.15321	0.00066	0.01131	0.0103		0.47578	0.40728	0.48066	0.44172	0.51005		0.51342	0.4395	0.51868	0.54697	0.47965		0.77614	0.81371	0.74573	0.78523	0.76717
2023		0.01046	0.15117	0.00063	0.01097	0.00998		0.47525	0.40767	0.47998	0.44099	0.50972		0.51429	0.44116	0.5194	0.54804	0.4803		0.77471	0.81312	0.7443	0.7839	0.76565
2024		0.01014	0.14915	0.0006	0.01063	0.00967		0.47472	0.40805	0.47929	0.44026	0.50939		0.51515	0.4428	0.52011	0.54911	0.48094		0.77329	0.81253	0.74288	0.78257	0.76414
2025		0.00983	0.14715	0.00057	0.01031	0.00936		0.47417	0.40841	0.47861	0.43952	0.50905		0.516	0.44444	0.52082	0.55017	0.48159		0.77187	0.81193	0.74146	0.78124	0.76262
2026		0.00952	0.14517	0.00054	0.01	0.00907		0.47363	0.40876	0.47792	0.43878	0.50871		0.51685	0.44607	0.52154	0.55122	0.48222		0.77046	0.81131	0.74005	0.77992	0.76112
2027		0.00923	0.14322	0.00052	0.0097	0.00878		0.47308	0.4091	0.47723	0.43804	0.50836		0.5177	0.44768	0.52225	0.55227	0.48286		0.76904	0.81069	0.73864	0.7786	0.75961
2028		0.00894	0.14129	0.00049	0.0094	0.00851		0.47252	0.40942	0.47655	0.43729	0.508		0.51854	0.44929	0.52296	0.55331	0.48349		0.76763	0.81005	0.73723	0.77728	0.75811
2029		0.00867	0.13938	0.00047	0.00912	0.00824		0.47196	0.40973	0.47586	0.43653	0.50765		0.51937	0.45089	0.52367	0.55435	0.48411		0.76622	0.80941	0.73583	0.77597	0.75661
2030		0.0084	0.1375	0.00045	0.00884	0.00798		0.47139	0.41002	0.47517	0.43577	0.50728		0.52021	0.45248	0.52438	0.55538	0.48474		0.76482	0.80875	0.73443	0.77466	0.75511
2031		0.00814	0.13563	0.00043	0.00857	0.00773		0.47082	0.4103	0.47448	0.43501	0.50692		0.52104	0.45406	0.52509	0.55641	0.48535		0.76341	0.80809	0.73304	0.77335	0.75361
2032		0.00789	0.13379	0.00041	0.00831	0.00749		0.47025	0.41057	0.4738	0.43425	0.50654		0.52186	0.45563	0.52579	0.55744	0.48597		0.76202	0.80742	0.73166	0.77205	0.75212
2033		0.00765	0.13197	0.00039	0.00806	0.00725		0.46967	0.41083	0.47311	0.43348	0.50617		0.52268	0.4572	0.5265	0.55846	0.48658		0.76062	0.80673	0.73027	0.77075	0.75063
2034		0.00741	0.13018	0.00037	0.00782	0.00702		0.46909	0.41107	0.47242	0.43271	0.50579		0.5235	0.45875	0.52721	0.55947	0.48719		0.75923	0.80604	0.7289	0.76945	0.74915
2035		0.00718	0.1284	0.00036	0.00758	0.0068		0.46851	0.4113	0.47173	0.43193	0.5054		0.52431	0.4603	0.52792	0.56049	0.48779		0.75784	0.80534	0.72752	0.76815	0.74767
2036		0.00696	0.12664	0.00034	0.00735	0.00659		0.46792	0.41152	0.47104	0.43115	0.50502		0.52512	0.46183	0.52862	0.56149	0.48839		0.75645	0.80463	0.72615	0.76686	0.74619
2037		0.00675	0.12491	0.00032	0.00713	0.00638		0.46733	0.41173	0.47035	0.43037	0.50462		0.52593	0.46336	0.52933	0.5625	0.48899		0.75507	0.80392	0.72479	0.76558	0.74471
2038		0.00654	0.1232	0.00031	0.00691	0.00618		0.46673	0.41192	0.46966	0.42959	0.50423		0.52673	0.46488	0.53003	0.5635	0.48959		0.75369	0.80319	0.72343	0.76429	0.74324
2039		0.00634	0.12151	0.00029	0.0067	0.00599		0.46613	0.41211	0.46897	0.4288	0.50383		0.52753	0.46639	0.53074	0.56449	0.49018		0.75231	0.80246	0.72207	0.76301	0.74177
2040		0.00614	0.11984	0.00028	0.0065	0.0058		0.46553	0.41228	0.46828	0.42801	0.50343		0.52833	0.46789	0.53144	0.56549	0.49077		0.75094	0.80171	0.72072	0.76174	0.7403
2041		0.00595	0.11818	0.00027	0.00631	0.00562		0.46493	0.41244	0.46759	0.42722	0.50302		0.52912	0.46938	0.53215	0.56648	0.49136		0.74957	0.80096	0.71938	0.76046	0.73884
2042		0.00577	0.11655	0.00026	0.00611	0.00544		0.46432	0.41258	0.4669	0.42642	0.50262		0.52991	0.47086	0.53285	0.56746	0.49194		0.74821	0.80021	0.71803	0.7592	0.73738
2043		0.00559	0.11494	0.00024	0.00593	0.00527		0.46371	0.41272	0.4662	0.42563	0.50221		0.5307	0.47234	0.53355	0.56844	0.49252		0.74685	0.79944	0.7167	0.75793	0.73592
2044		0.00542	0.11335	0.00023	0.00575	0.00511		0.4631	0.41284	0.46551	0.42483	0.50179		0.53148	0.47381	0.53426	0.56942	0.4931		0.74549	0.79867	0.71536	0.75667	0.73447
2045		0.00525	0.11178	0.00022	0.00558	0.00494		0.46248	0.41295	0.46482	0.42403	0.50137		0.53227	0.47526	0.53496	0.5704	0.49368		0.74413	0.79789	0.71403	0.75541	0.73302
2046		0.00509	0.11023	0.00021	0.00541	0.00479		0.46186	0.41305	0.46413	0.42322	0.50096		0.53305	0.47671	0.53566	0.57137	0.49426		0.74278	0.79711	0.71271	0.75416	0.73157
2047		0.00493	0.1087	0.0002	0.00525	0.00464		0.46124	0.41315	0.46344	0.42242	0.50053		0.53382	0.47815	0.53636	0.57234	0.49483		0.74143	0.79631	0.71139	0.75291	0.73013
2048		0.00478	0.10719	0.00019	0.00509	0.00449		0.46062	0.41322	0.46275	0.42161	0.50011		0.5346	0.47959	0.53706	0.5733	0.4954		0.74009	0.79551	0.71007	0.75166	0.72869
2049		0.00463	0.10569	0.00018	0.00493	0.00435		0.46	0.41329	0.46205	0.4208	0.49968		0.53537	0.48101	0.53776	0.57427	0.49597		0.73875	0.79471	0.70876	0.75042	0.72725
2050		0.00449	0.10422	0.00017	0.00479	0.00422		0.45937	0.41335	0.46136	0.41999	0.49925		0.53614	0.48243	0.53846	0.57523	0.49653		0.73741	0.79389	0.70746	0.74918	0.72582
2051		0.00435	0.10276	0.00017	0.00464	0.00408		0.45874	0.4134	0.46067	0.41918	0.49882		0.53691	0.48384	0.53916	0.57618	0.4971		0.73608	0.79307	0.70615	0.74794	0.72439
2052		0.00422	0.10133	0.00016	0.0045	0.00396		0.45811	0.41344	0.45998	0.41836	0.49839		0.53767	0.48524	0.53986	0.57714	0.49766		0.73475	0.79225	0.70485	0.74671	0.72296
2053		0.00409	0.09991	0.00015	0.00437	0.00383		0.45748	0.41346	0.45929	0.41755	0.49795		0.53843	0.48663	0.54056	0.57809	0.49822		0.73342	0.79142	0.70356	0.74548	0.72154
2054		0.00396	0.09851	0.00014	0.00423	0.00371		0.45684	0.41348	0.45859	0.41673	0.49751		0.53919	0.48801	0.54126	0.57904	0.49878		0.7321	0.79058	0.70227	0.74426	0.72012
2055		0.00384	0.09713	0.00014	0.00411	0.00359		0.45621	0.41349	0.4579	0.41591	0.49707		0.53995	0.48939	0.54196	0.57998	0.49933		0.73078	0.78974	0.70098	0.74304	0.71871
2056		0.00372	0.09576	0.00013	0.00398	0.00348		0.45557	0.41348	0.45721	0.41509	0.49663		0.54071	0.49076	0.54266	0.58093	0.49989		0.72947	0.78889	0.6997	0.74182	0.71729
2057		0.00361	0.09441	0.00013	0.00386	0.00337		0.45493	0.41347	0.45652	0.41427	0.49619		0.54146	0.49212	0.54336	0.58187	0.50044		0.72816	0.78803	0.69843	0.74061	0.71589
2058		0.0035	0.09308	0.00012	0.00375	0.00327		0.45429	0.41345	0.45583	0.41344	0.49574		0.54221	0.49347	0.54405	0.58281	0.50099		0.72685	0.78717	0.69715	0.7394	0.71448
2059		0.00339	0.09177	0.00011	0.00363	0.00316		0.45364	0.41341	0.45513	0.41262	0.49529		0.54297	0.49481	0.54475	0.58374	0.50154		0.72555	0.78631	0.69589	0.7382	0.71308
2060		0.00329	0.09048	0.00011	0.00353	0.00307		0.453	0.41337	0.45444	0.4118	0.49484		0.54371	0.49615	0.54545	0.58468	0.50209		0.72425	0.78544	0.69462	0.737	0.71168
2061		0.00319	0.0892	0.0001	0.00342	0.00297		0.45235	0.41332	0.45375	0.41097	0.49439		0.54446	0.49748	0.54614	0.58561	0.50264		0.72295	0.78456	0.69336	0.7358	0.71029
2062		0.00309	0.08794	0.0001	0.00332	0.00288		0.4517	0.41326	0.45306	0.41014	0.49394		0.54521	0.4988	0.54684	0.58654	0.50318		0.72166	0.78368	0.69211	0.73461	0.7089
2063		0.00299	0.08669	0.0001	0.00322	0.00279		0.45106	0.41319	0.45237	0.40932	0.49349		0.54595	0.50012	0.54754	0.58747	0.50373		0.72037	0.7828	0.69085	0.73342	0.70751
2064		0.0029	0.08546	9e-05	0.00312	0.0027		0.45041	0.41311	0.45168	0.40849	0.49303		0.54669	0.50142	0.54823	0.58839	0.50427		0.71908	0.78191	0.68961	0.73224	0.70613
2065		0.00281	0.08425	9e-05	0.00303	0.00261		0.44975	0.41302	0.45098	0.40766	0.49258		0.54743	0.50272	0.54893	0.58932	0.50481		0.7178	0.78102	0.68836	0.73106	0.70475
2066		0.00273	0.08306	8e-05	0.00294	0.00253		0.4491	0.41293	0.45029	0.40683	0.49212		0.54817	0.50402	0.54962	0.59024	0.50535		0.71652	0.78012	0.68712	0.72988	0.70338
2067		0.00264	0.08188	8e-05	0.00285	0.00245		0.44845	0.41282	0.4496	0.406	0.49166		0.54891	0.5053	0.55032	0.59116	0.50589		0.71525	0.77922	0.68589	0.72871	0.702
2068		0.00256	0.08071	8e-05	0.00276	0.00238		0.44779	0.41271	0.44891	0.40516	0.4912		0.54964	0.50658	0.55101	0.59207	0.50643		0.71398	0.77831	0.68466	0.72754	0.70063
2069		0.00248	0.07956	7e-05	0.00268	0.0023		0.44714	0.41259	0.44822	0.40433	0.49073		0.55038	0.50785	0.55171	0.59299	0.50696		0.71272	0.7774	0.68343	0.72637	0.69927
2070		0.00241	0.07843	7e-05	0.0026	0.00223		0.44648	0.41246	0.44753	0.4035	0.49027		0.55111	0.50911	0.5524	0.5939	0.5075		0.71145	0.77649	0.68221	0.72521	0.69791
2071		0.00233	0.07731	7e-05	0.00252	0.00216		0.44582	0.41232	0.44684	0.40267	0.48981		0.55184	0.51037	0.5531	0.59481	0.50803		0.71019	0.77557	0.68099	0.72405	0.69655
2072		0.00226	0.07621	6e-05	0.00245	0.00209		0.44517	0.41217	0.44615	0.40183	0.48934		0.55257	0.51162	0.55379	0.59572	0.50857		0.70894	0.77465	0.67977	0.7229	0.6952
2073		0.00219	0.07512	6e-05	0.00237	0.00203		0.44451	0.41202	0.44546	0.401	0.48887		0.5533	0.51286	0.55448	0.59663	0.5091		0.70769	0.77373	0.67856	0.72175	0.69385
2074		0.00213	0.07404	6e-05	0.0023	0.00196		0.44385	0.41186	0.44477	0.40016	0.48841		0.55403	0.5141	0.55518	0.59753	0.50963		0.70644	0.7728	0.67735	0.72061	0.6925
2075		0.00206	0.07298	5e-05	0.00223	0.0019		0.44319	0.41169	0.44408	0.39933	0.48794		0.55475	0.51533	0.55587	0.59844	0.51016		0.7052	0.77187	0.67615	0.71947	0.69116
2076		0.002	0.07194	5e-05	0.00217	0.00184		0.44252	0.41151	0.44339	0.39849	0.48747		0.55548	0.51655	0.55656	0.59934	0.51069		0.70396	0.77093	0.67495	0.71833	0.68982
2077		0.00194	0.07091	5e-05	0.0021	0.00179		0.44186	0.41133	0.4427	0.39766	0.487		0.5562	0.51777	0.55725	0.60024	0.51122		0.70272	0.76999	0.67376	0.71719	0.68848
2078		0.00188	0.06989	5e-05	0.00204	0.00173		0.4412	0.41113	0.44201	0.39682	0.48653		0.55692	0.51897	0.55795	0.60114	0.51174		0.70149	0.76905	0.67257	0.71606	0.68715
2079		0.00182	0.06889	4e-05	0.00198	0.00168		0.44053	0.41093	0.44132	0.39599	0.48605		0.55764	0.52018	0.55864	0.60203	0.51227		0.70026	0.76811	0.67138	0.71494	0.68582
2080		0.00177	0.0679	4e-05	0.00192	0.00162		0.43987	0.41073	0.44063	0.39515	0.48558		0.55836	0.52137	0.55933	0.60293	0.5128		0.69904	0.76716	0.6702	0.71382	0.6845
2081		0.00171	0.06692	4e-05	0.00186	0.00157		0.4392	0.41051	0.43994	0.39431	0.48511		0.55908	0.52256	0.56002	0.60382	0.51332		0.69782	0.76621	0.66902	0.7127	0.68318
2082		0.00166	0.06596	4e-05	0.00181	0.00152		0.43854	0.41029	0.43925	0.39348	0.48463		0.5598	0.52375	0.56071	0.60472	0.51385		0.6966	0.76526	0.66784	0.71158	0.68186
2083		0.00161	0.06501	4e-05	0.00175	0.00148		0.43787	0.41007	0.43856	0.39264	0.48416		0.56052	0.52492	0.5614	0.60561	0.51437		0.69539	0.76431	0.66667	0.71047	0.68055
2084		0.00156	0.06407	4e-05	0.0017	0.00143		0.43721	0.40983	0.43787	0.3918	0.48368		0.56123	0.52609	0.56209	0.6065	0.51489		0.69418	0.76335	0.6655	0.70937	0.67924
2085		0.00151	0.06315	3e-05	0.00165	0.00139		0.43654	0.40959	0.43718	0.39097	0.4832		0.56195	0.52726	0.56278	0.60738	0.51541		0.69297	0.76239	0.66434	0.70826	0.67793
2086		0.00147	0.06224	3e-05	0.0016	0.00134		0.43587	0.40934	0.4365	0.39013	0.48272		0.56266	0.52842	0.56347	0.60827	0.51593		0.69177	0.76143	0.66318	0.70717	0.67663
2087		0.00142	0.06134	3e-05	0.00155	0.0013		0.4352	0.40909	0.43581	0.38929	0.48225		0.56338	0.52957	0.56416	0.60915	0.51645		0.69057	0.76047	0.66203	0.70607	0.67533
2088		0.00138	0.06046	3e-05	0.00151	0.00126		0.43453	0.40883	0.43512	0.38846	0.48177		0.56409	0.53072	0.56485	0.61004	0.51697		0.68938	0.7595	0.66087	0.70498	0.67403
2089		0.00134	0.05958	3e-05	0.00146	0.00122		0.43387	0.40856	0.43443	0.38762	0.48129		0.5648	0.53186	0.56554	0.61092	0.51749		0.68819	0.75853	0.65973	0.70389	0.67274
2090		0.0013	0.05872	3e-05	0.00142	0.00118		0.4332	0.40829	0.43375	0.38678	0.48081		0.56551	0.53299	0.56623	0.6118	0.51801		0.687	0.75756	0.65858	0.70281	0.67145
2091		0.00126	0.05787	3e-05	0.00138	0.00115		0.43253	0.40801	0.43306	0.38595	0.48032		0.56622	0.53412	0.56692	0.61268	0.51853		0.68582	0.75659	0.65744	0.70173	0.67017
2092		0.00122	0.05704	2e-05	0.00134	0.00111		0.43186	0.40772	0.43237	0.38511	0.47984		0.56693	0.53524	0.5676	0.61355	0.51905		0.68464	0.75562	0.6563	0.70065	0.66889
2093		0.00118	0.05621	2e-05	0.0013	0.00108		0.43119	0.40743	0.43169	0.38427	0.47936		0.56763	0.53636	0.56829	0.61443	0.51956		0.68346	0.75465	0.65517	0.69958	0.66761
2094		0.00115	0.0554	2e-05	0.00126	0.00104		0.43052	0.40713	0.431	0.38344	0.47888		0.56834	0.53747	0.56898	0.6153	0.52008		0.68229	0.75367	0.65404	0.69851	0.66633
2095		0.00111	0.05459	2e-05	0.00122	0.00101		0.42984	0.40683	0.43031	0.3826	0.4784		0.56904	0.53858	0.56967	0.61618	0.5206		0.68112	0.75269	0.65292	0.69745	0.66506
2096		0.00108	0.0538	2e-05	0.00118	0.00098		0.42917	0.40652	0.42963	0.38177	0.47791		0.56975	0.53968	0.57035	0.61705	0.52111		0.67996	0.75171	0.65179	0.69639	0.6638
2097		0.00104	0.05302	2e-05	0.00115	0.00095		0.4285	0.40621	0.42894	0.38093	0.47743		0.57045	0.54077	0.57104	0.61792	0.52162		0.6788	0.75073	0.65068	0.69533	0.66253
2098		0.00101	0.05225	2e-05	0.00112	0.00092		0.42783	0.40589	0.42826	0.3801	0.47694		0.57116	0.54186	0.57172	0.61879	0.52214		0.67764	0.74975	0.64956	0.69428	0.66127
2099		0.00098	0.05149	2e-05	0.00108	0.00089		0.42716	0.40556	0.42757	0.37926	0.47646		0.57186	0.54294	0.57241	0.61966	0.52265		0.67649	0.74877	0.64845	0.69323	0.66002
2100		0.00095	0.05075	2e-05	0.00105	0.00086		0.42649	0.40523	0.42689	0.37843	0.47597		0.57256	0.54402	0.5731	0.62052	0.52316		0.67534	0.74778	0.64734	0.69219	0.65876

## Sheet: Figure 3
year	counterei	sei-1
0	0.79839	0.79839
1	0.801568	0.801488
2	0.804758	0.804557
3	0.807962	0.807593
4	0.811178	0.810596
5	0.814407	0.813566
6	0.817649	0.8165
7	0.820903	0.819398
8	0.824171	0.822259
9	0.827451	0.825081
10	0.830745	0.827865
11	0.834052	0.830607
12	0.837372	0.833309
13	0.840705	0.835968
14	0.844052	0.838583
15	0.847411	0.841154
16	0.850784	0.84368
17	0.854171	0.84616
18	0.857571	0.848592
19	0.860985	0.850976
20	0.864412	0.853312
21	0.867853	0.855598
22	0.871307	0.857834
23	0.874775	0.860018
24	0.878257	0.862151
25	0.881753	0.864231
26	0.885263	0.866258
27	0.888787	0.868232
28	0.892325	0.870151
29	0.895877	0.872016
30	0.899443	0.873825
31	0.903023	0.875579
32	0.906618	0.877277
33	0.910226	0.878919
34	0.91385	0.880504
35	0.917487	0.882033
36	0.921139	0.883504
37	0.924806	0.884918
38	0.928487	0.886276
39	0.932183	0.887576
40	0.935893	0.888818
41	0.939619	0.890004
42	0.943359	0.891132
43	0.947114	0.892203
44	0.950884	0.893218
45	0.954669	0.894175
46	0.958469	0.895077
47	0.962284	0.895922
48	0.966115	0.896711
49	0.96996	0.897445
50	0.973821	0.898124
51	0.977698	0.898748
52	0.981589	0.899318
53	0.985497	0.899835
54	0.989419	0.900299
55	0.993358	0.90071
56	0.997312	0.901069
57	1.00128	0.901376
58	1.00527	0.901634
59	1.00927	0.901841
60	1.01329	0.901999
61	1.01732	0.902108
62	1.02137	0.90217
63	1.02543	0.902184
64	1.02952	0.902152
65	1.03361	0.902075
66	1.03773	0.901953
67	1.04186	0.901787
68	1.04601	0.901578
69	1.05017	0.901327
70	1.05435	0.901034
71	1.05855	0.900701
72	1.06276	0.900329
73	1.06699	0.899917
74	1.07124	0.899467
75	1.0755	0.898981
76	1.07978	0.898458
77	1.08408	0.897899
78	1.0884	0.897306
79	1.09273	0.89668
80	1.09708	0.89602
81	1.10145	0.895329
82	1.10583	0.894606
83	1.11023	0.893854
84	1.11465	0.893071
85	1.11909	0.89226
86	1.12354	0.891421
87	1.12802	0.890556
88	1.13251	0.889664
89	1.13701	0.888746
90	1.14154	0.887804
91	1.14608	0.886838
92	1.15064	0.885848
93	1.15523	0.884837
94	1.15982	0.883803
95	1.16444	0.882749
96	1.16908	0.881674
97	1.17373	0.88058
98	1.1784	0.879466
99	1.18309	0.878335
100	1.1878	0.877186
101	1.19253	0.87602
102	1.19728	0.874837
103	1.20204	0.873639
104	1.20683	0.872426
105	1.21163	0.871198
106	1.21645	0.869957
107	1.2213	0.868702
108	1.22616	0.867434
109	1.23104	0.866153
110	1.23594	0.864861
111	1.24086	0.863558
112	1.2458	0.862244
113	1.25076	0.860919
114	1.25573	0.859585
115	1.26073	0.858241
116	1.26575	0.856888
117	1.27079	0.855527
118	1.27585	0.854158
119	1.28093	0.85278
120	1.28602	0.851396
121	1.29114	0.850005
122	1.29628	0.848607
123	1.30144	0.847203
124	1.30662	0.845793
125	1.31182	0.844378
126	1.31705	0.842958
127	1.32229	0.841533
128	1.32755	0.840103
129	1.33284	0.838669
130	1.33814	0.837232
131	1.34347	0.83579
132	1.34882	0.834346
133	1.35419	0.832898
134	1.35958	0.831448
135	1.36499	0.829995
136	1.37042	0.828539
137	1.37588	0.827082
138	1.38135	0.825623
139	1.38685	0.824162
140	1.39237	0.8227
141	1.39791	0.821236
142	1.40348	0.819772
143	1.40906	0.818307
144	1.41467	0.816841
145	1.4203	0.815375
146	1.42596	0.813908
147	1.43163	0.812442
148	1.43733	0.810975
149	1.44305	0.809509
150	1.4488	0.808043
151	1.45457	0.806578
152	1.46036	0.805113
153	1.46617	0.803649
154	1.472	0.802187
155	1.47786	0.800725
156	1.48375	0.799264
157	1.48965	0.797805
158	1.49558	0.796347
159	1.50154	0.794891
160	1.50751	0.793436
161	1.51351	0.791983
162	1.51954	0.790532
163	1.52559	0.789083
164	1.53166	0.787635
165	1.53776	0.78619
166	1.54388	0.784747
167	1.55002	0.783307
168	1.55619	0.781869
169	1.56239	0.780433
170	1.56861	0.778999
171	1.57485	0.777569
172	1.58112	0.77614
173	1.58741	0.774715
174	1.59373	0.773292
175	1.60007	0.771872
176	1.60644	0.770455
177	1.61284	0.769041
178	1.61926	0.76763
179	1.6257	0.766222
180	1.63217	0.764817
181	1.63867	0.763415
182	1.64519	0.762016
183	1.65174	0.76062
184	1.65832	0.759228
185	1.66492	0.757838
186	1.67155	0.756453
187	1.6782	0.75507
188	1.68488	0.753691
189	1.69159	0.752315
190	1.69832	0.750943
191	1.70508	0.749574
192	1.71187	0.748208
193	1.71868	0.746846
194	1.72552	0.745488
195	1.73239	0.744133
196	1.73929	0.742781
197	1.74621	0.741434
198	1.75316	0.740089
199	1.76014	0.738749
200	1.76715	0.737412
